# Supplementary material for: Synthesis, biological evaluation and mechanism study of chalcone analogues as novel anti-cancer agents
Source: Royal Society of Chemistry journal article supplement (doi:10.1039/c5ra14888j), 2015-01-01

## **Supporting Information**

# **Synthesis, Biological Evaluation and Mechanism Study of Chalcone Analogues as Novel Anti-cancer Agents**

Jie Chen<sup>a</sup>, Jun Yan<sup>a</sup>, Jinhui Hu<sup>a</sup>, Yanqing Pang<sup>a</sup>, Ling Huang<sup>a\*</sup>, Xingshu Li<sup>a\*</sup>

<sup>a</sup>School of Pharmaceutical Sciences, Sun Yat-sen University, Guangzhou, 510006, China

**S I. NMR spectrums of target compounds (S2-S15)**

**S II. HPLC chromatograms of target compounds (S16 – S20)**

**S III. High resolution mass spectra of target compounds (S21 – S27)**

**S IV. IR spectra of target compounds (S28 - S32)**

# SI. NMR spectra of target compounds

## 8a

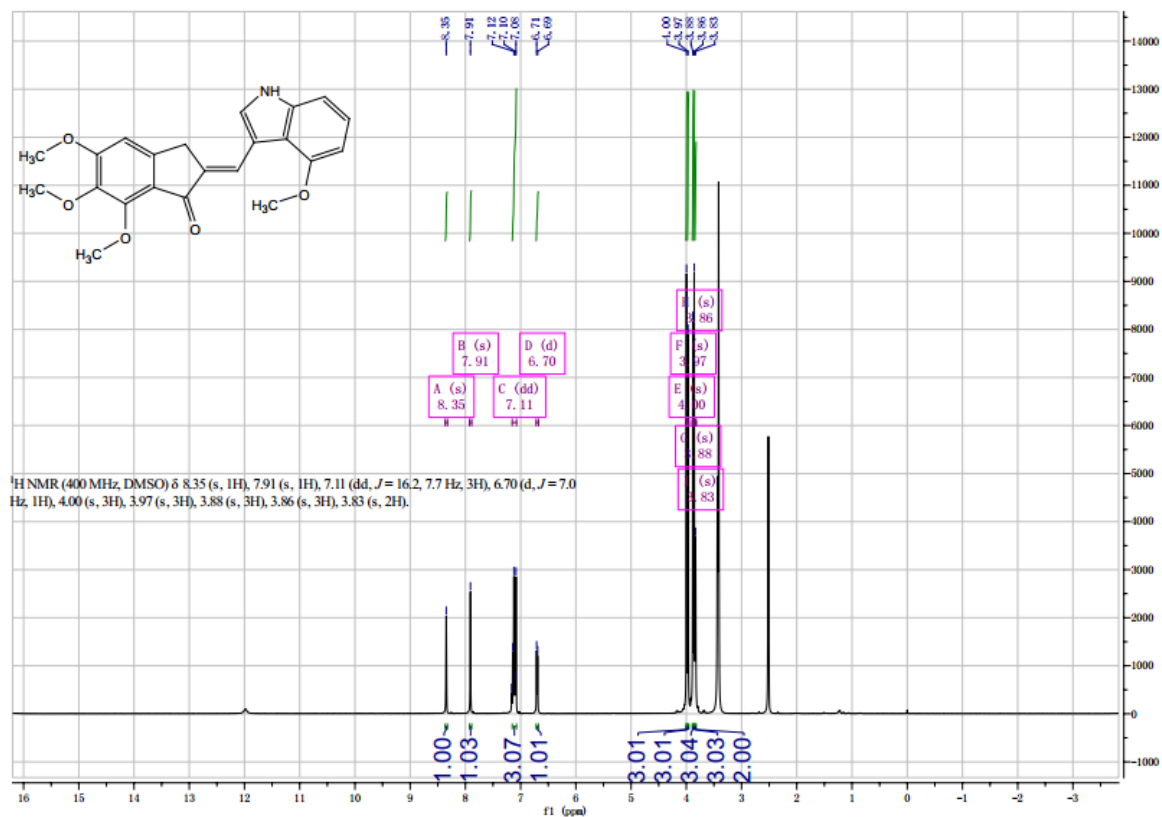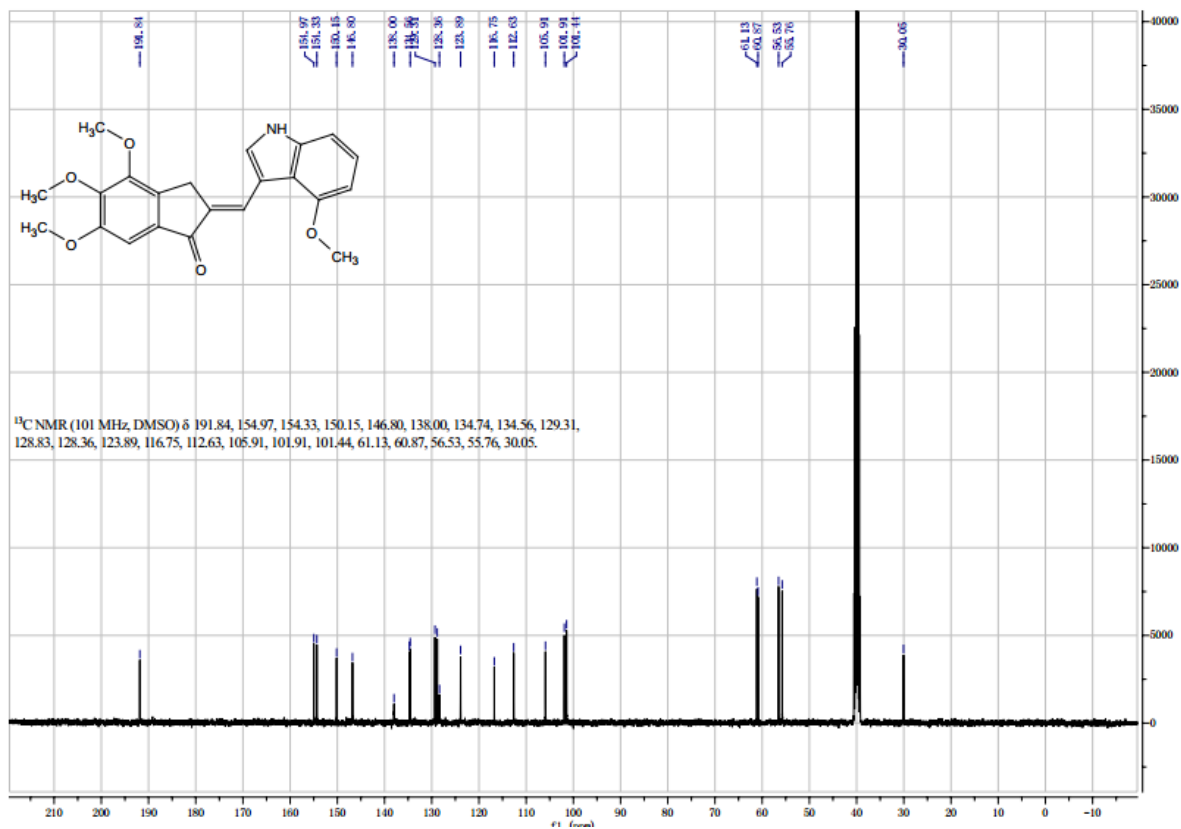

8b

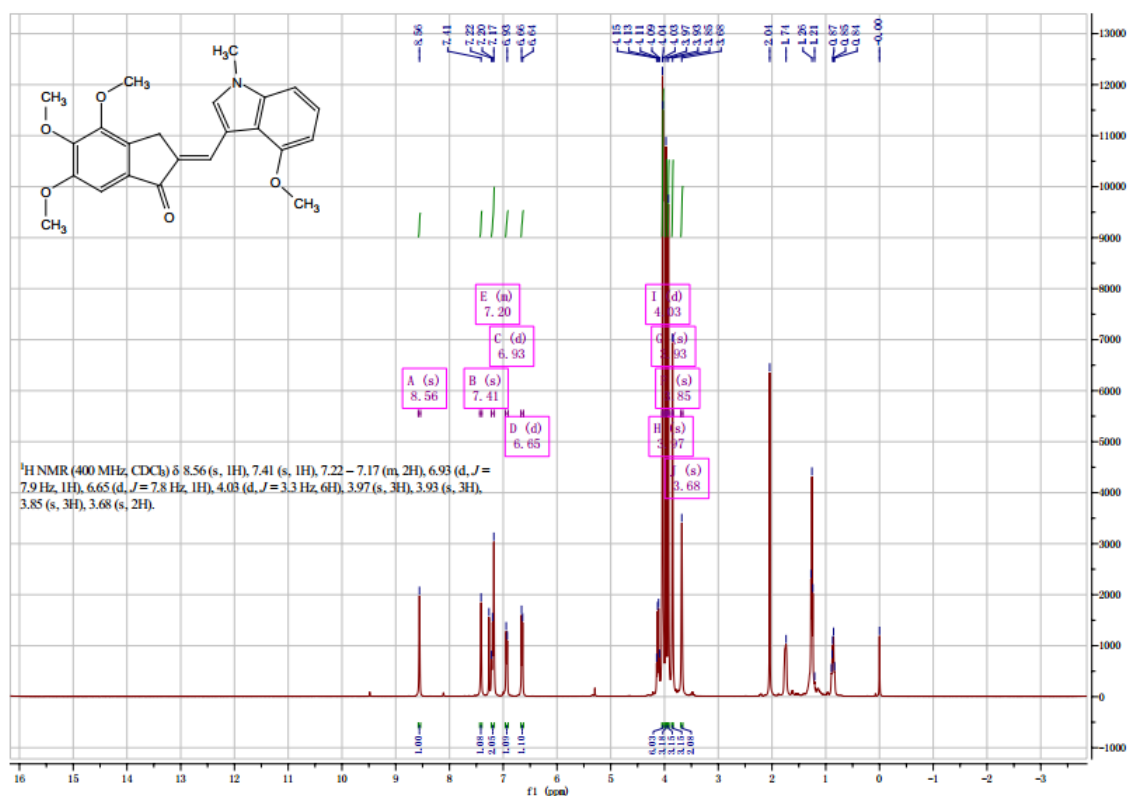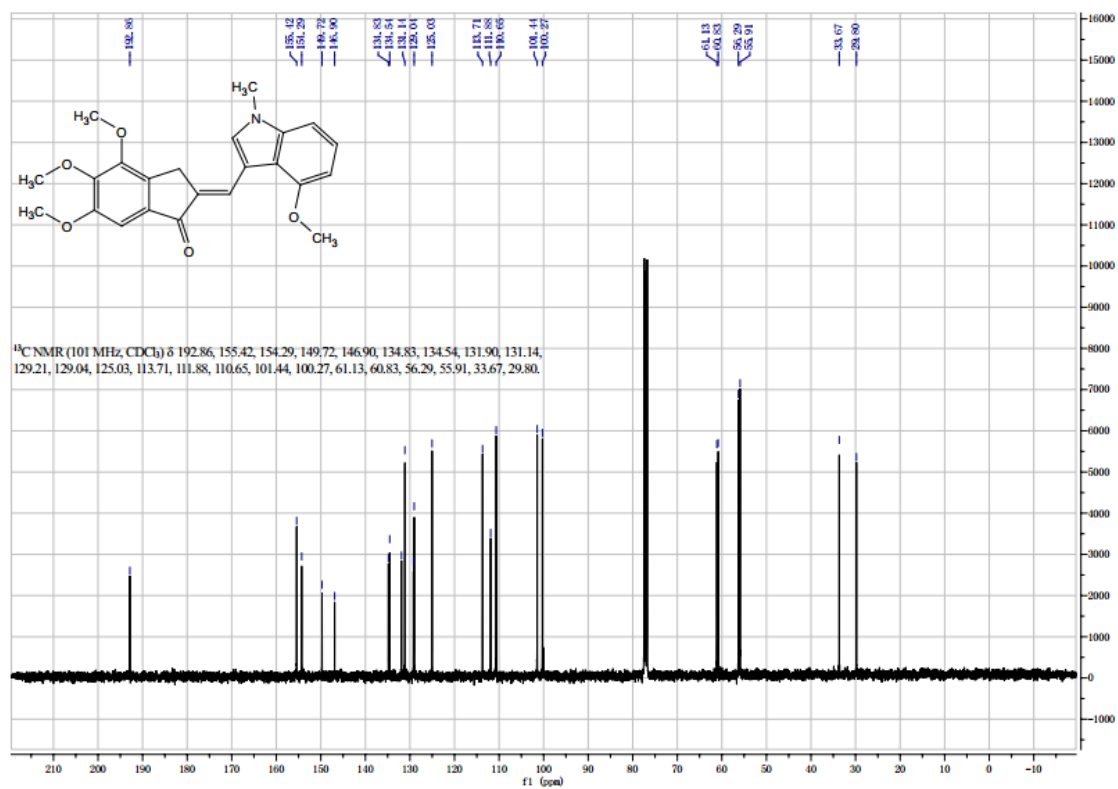

8c

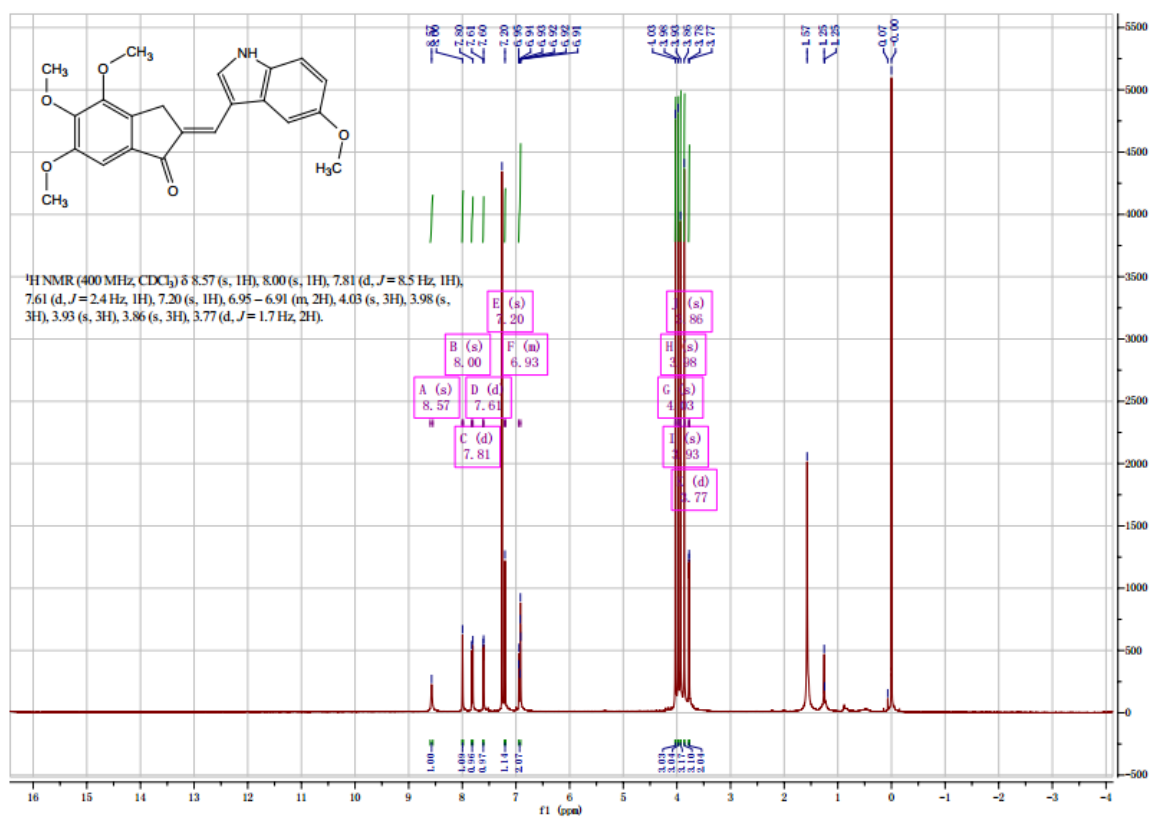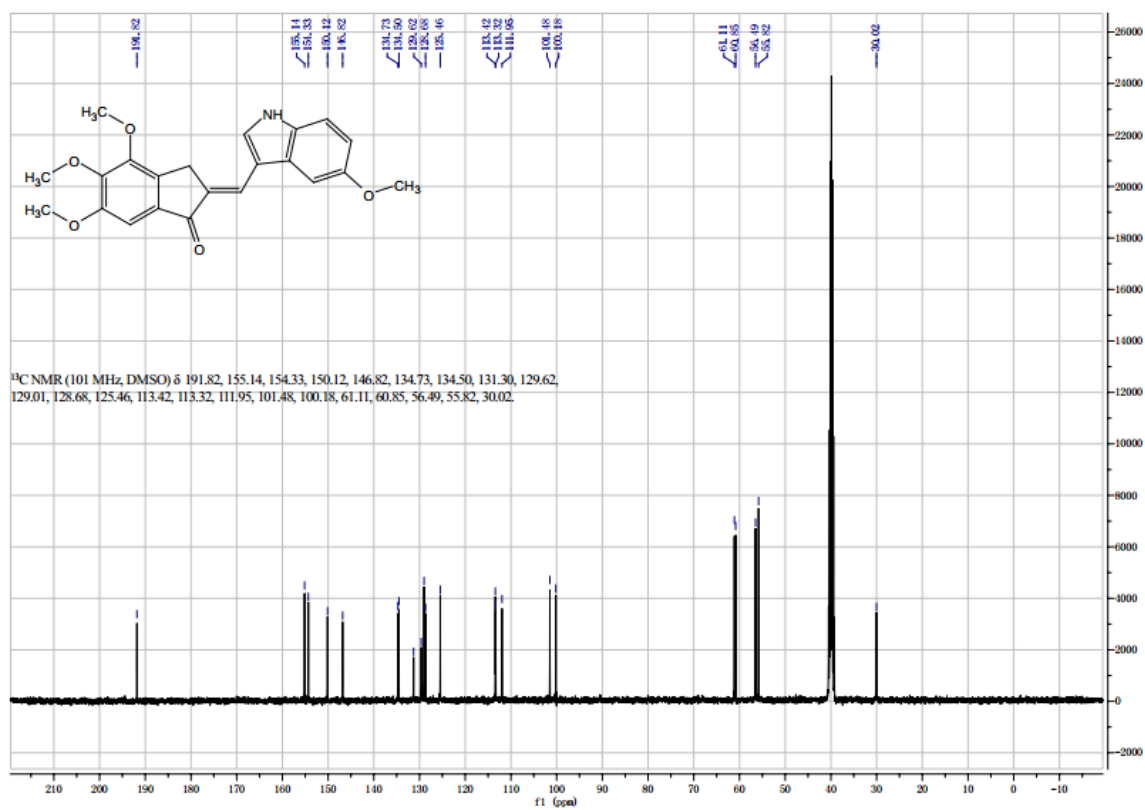

8d

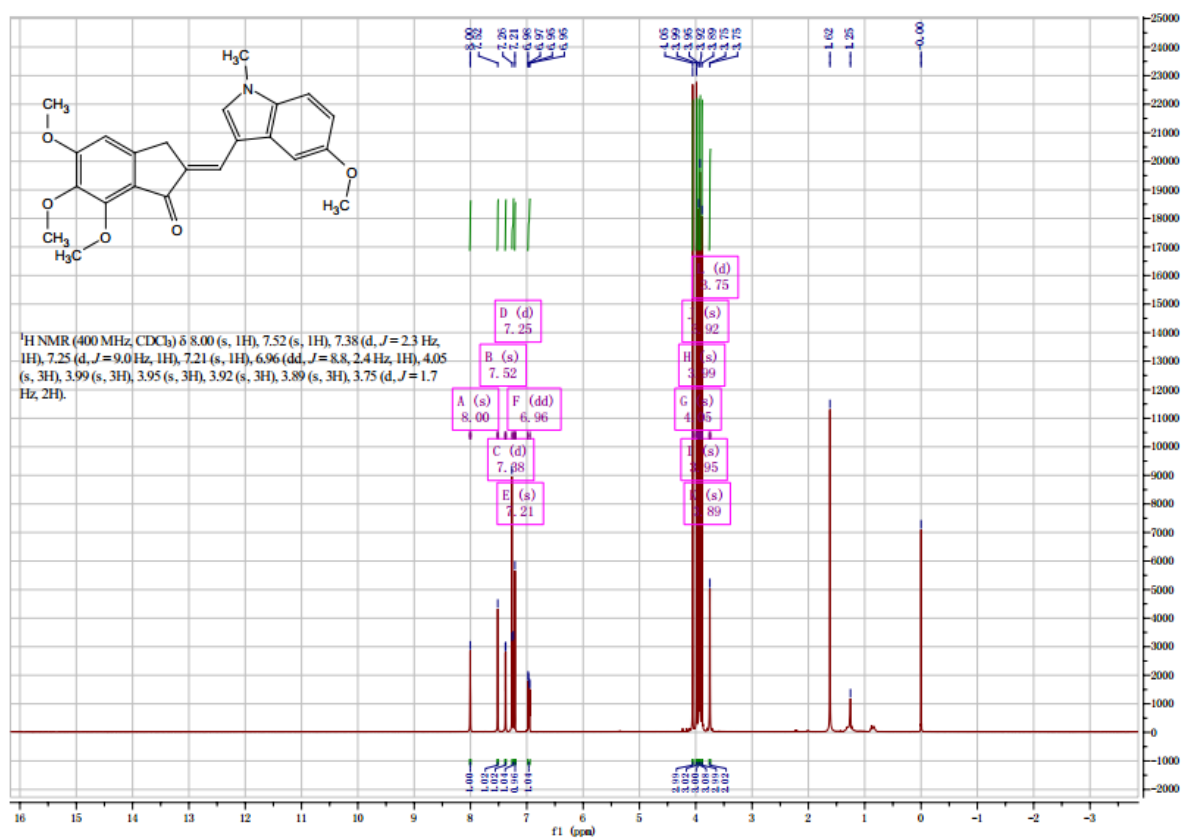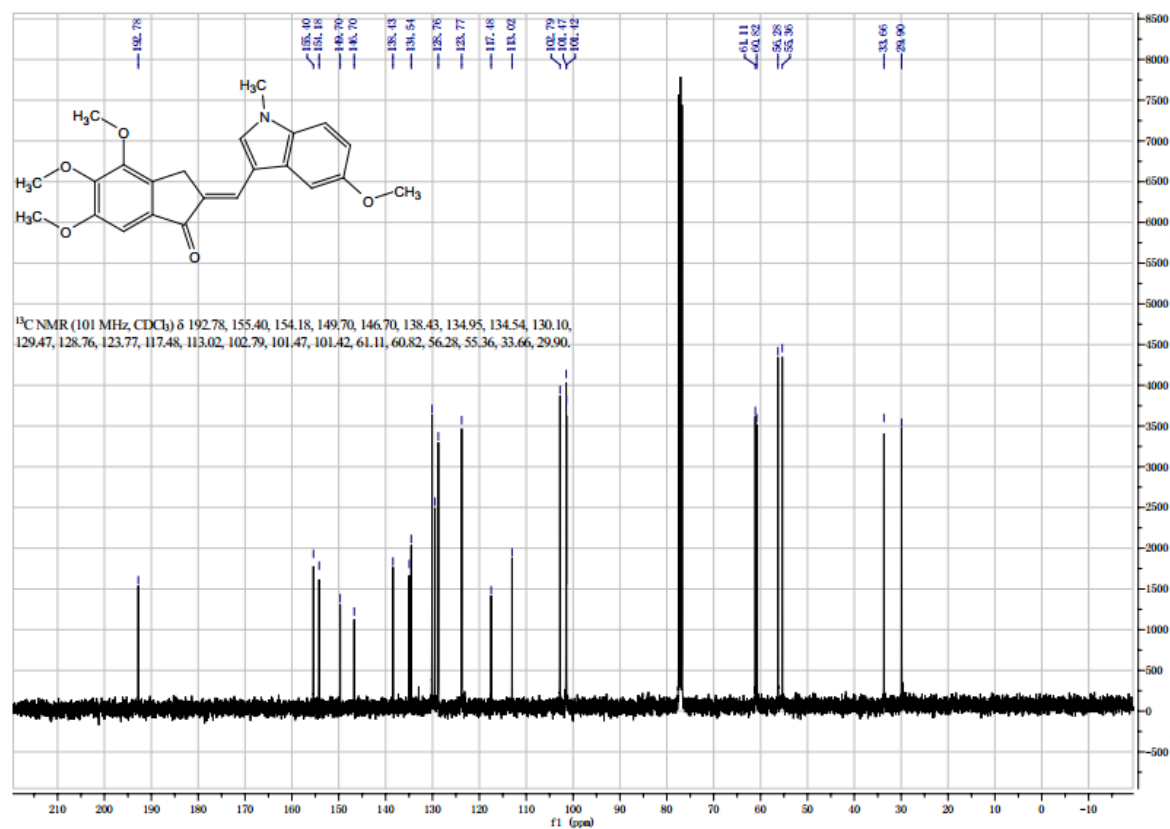

8e

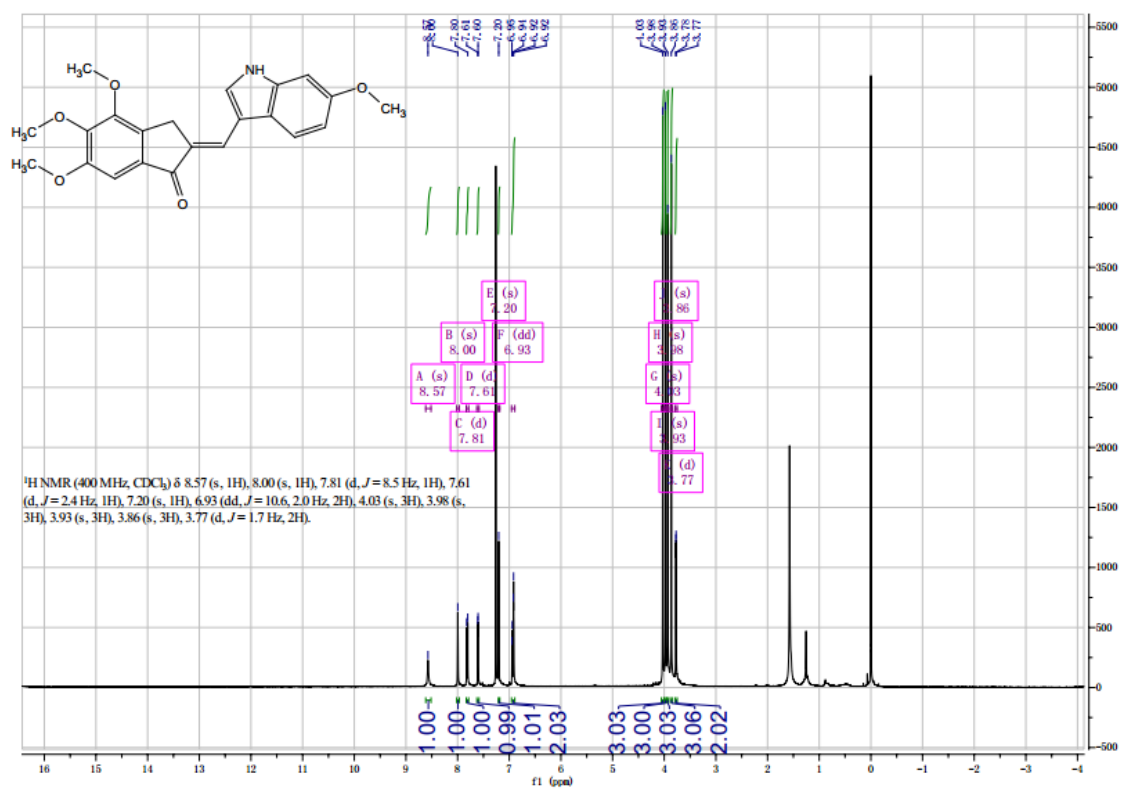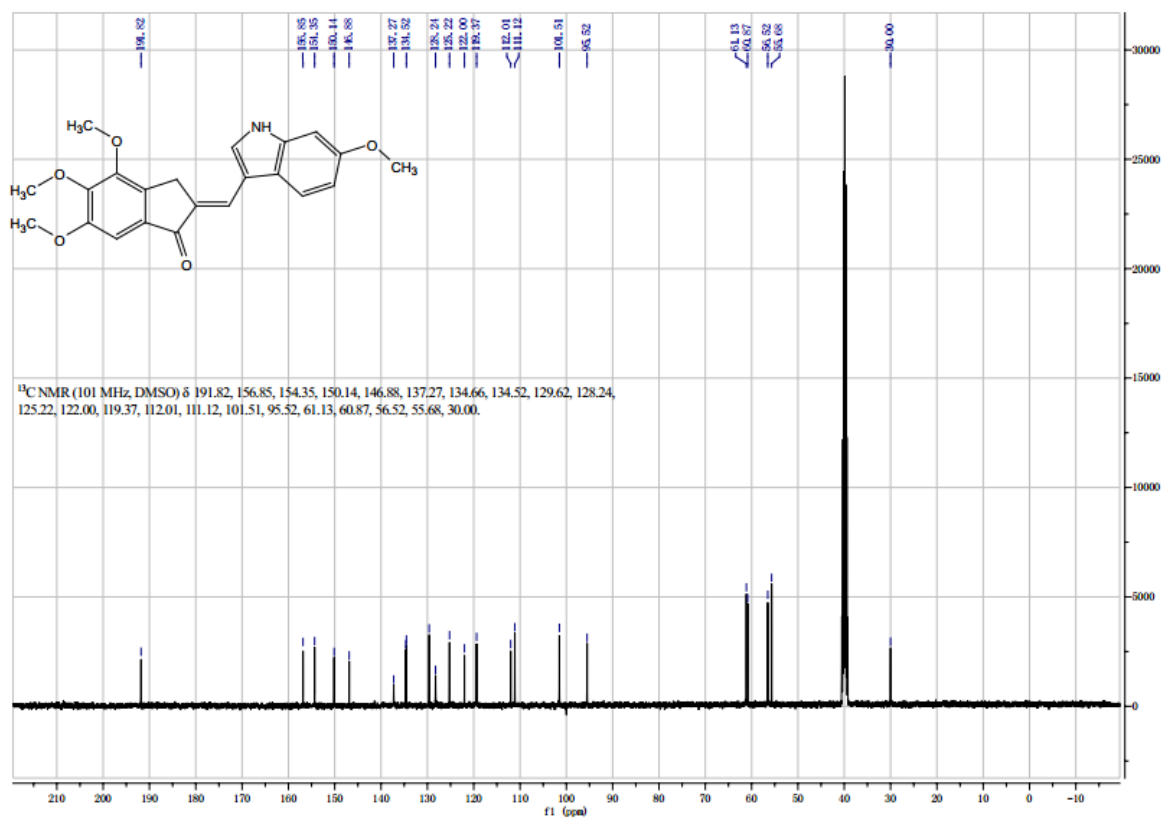

8f

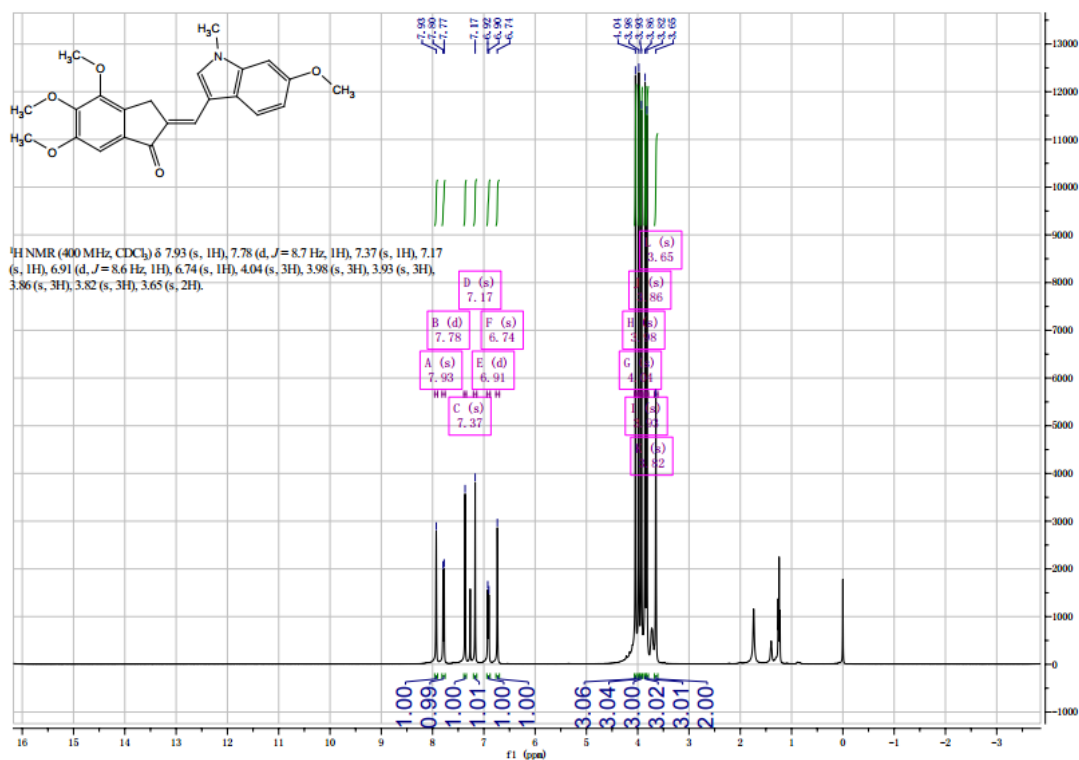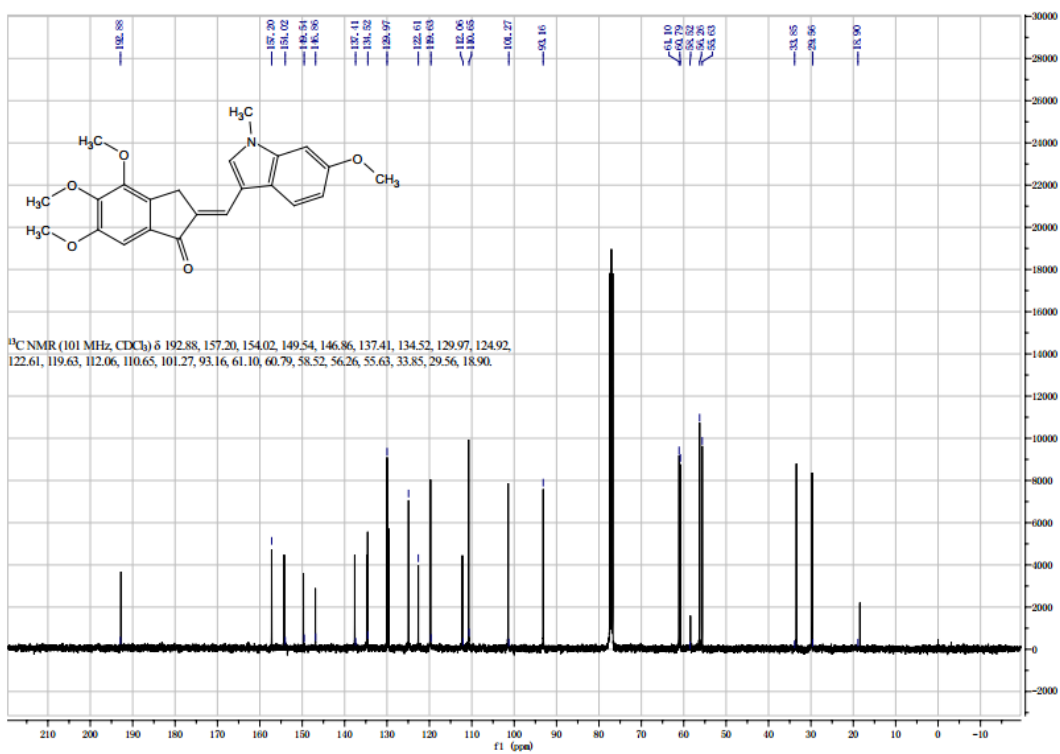

10a

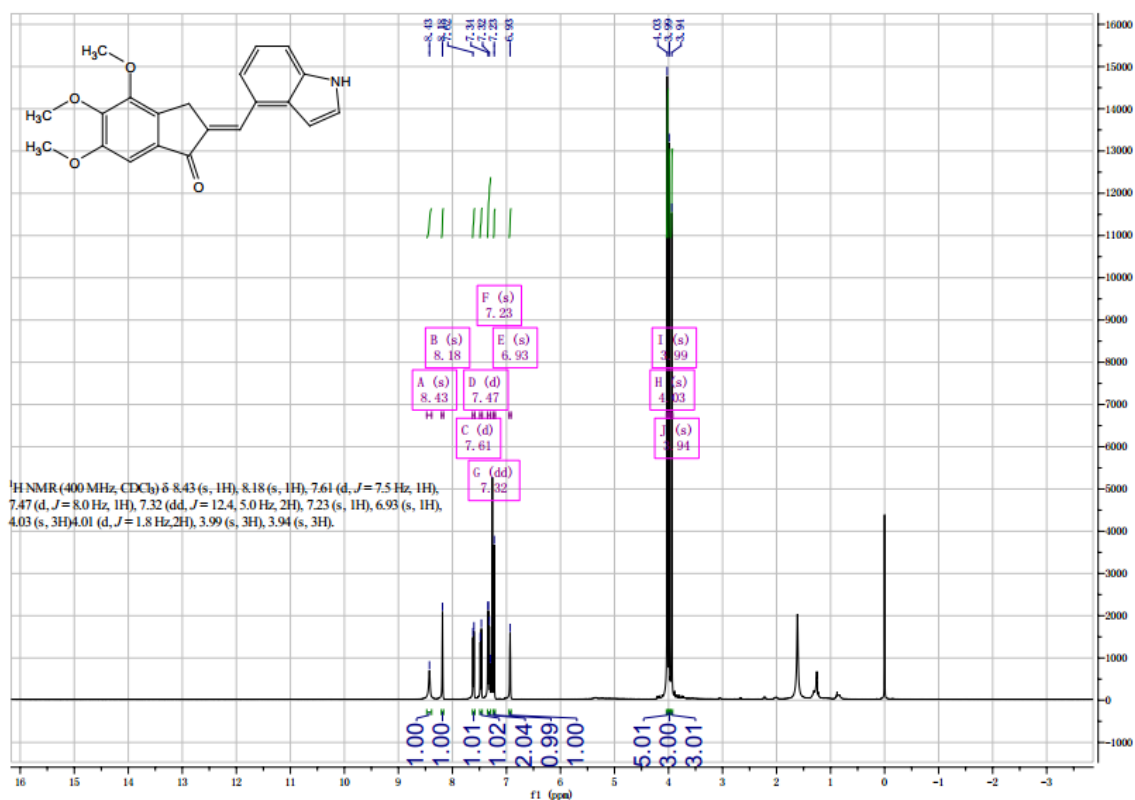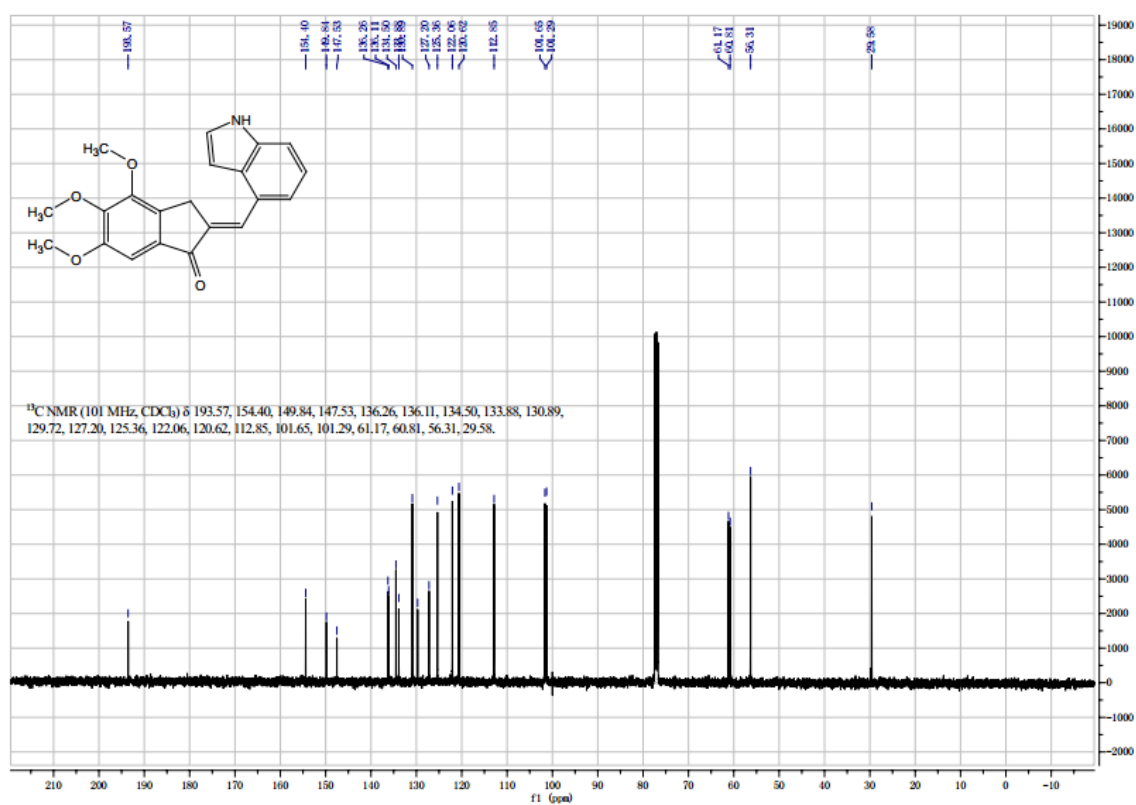



10b

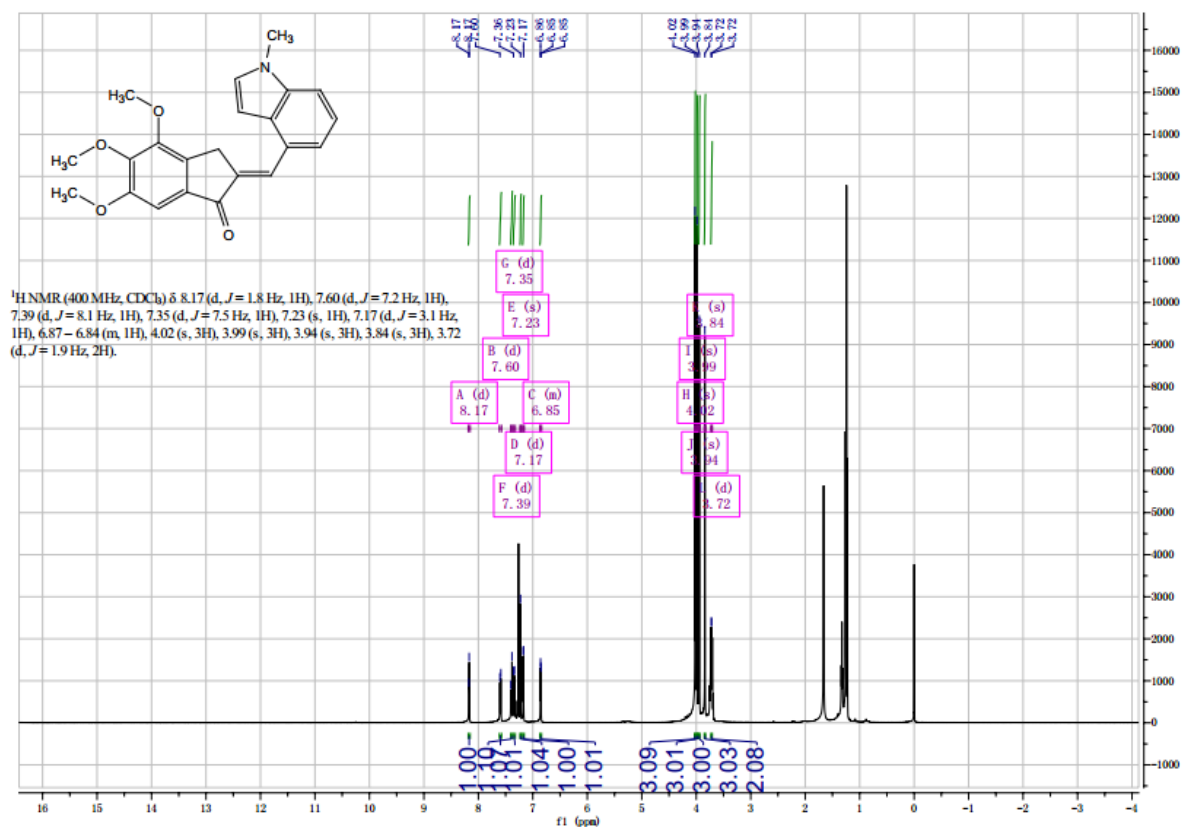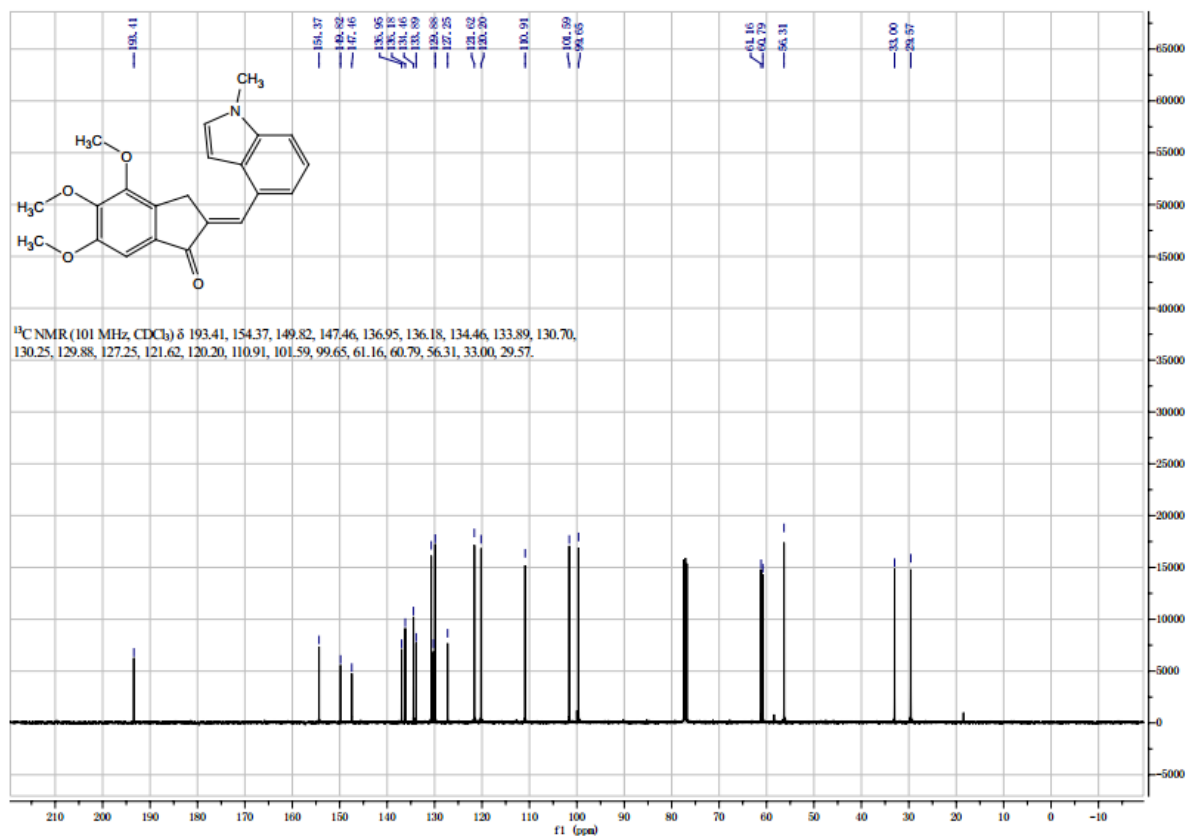

10c

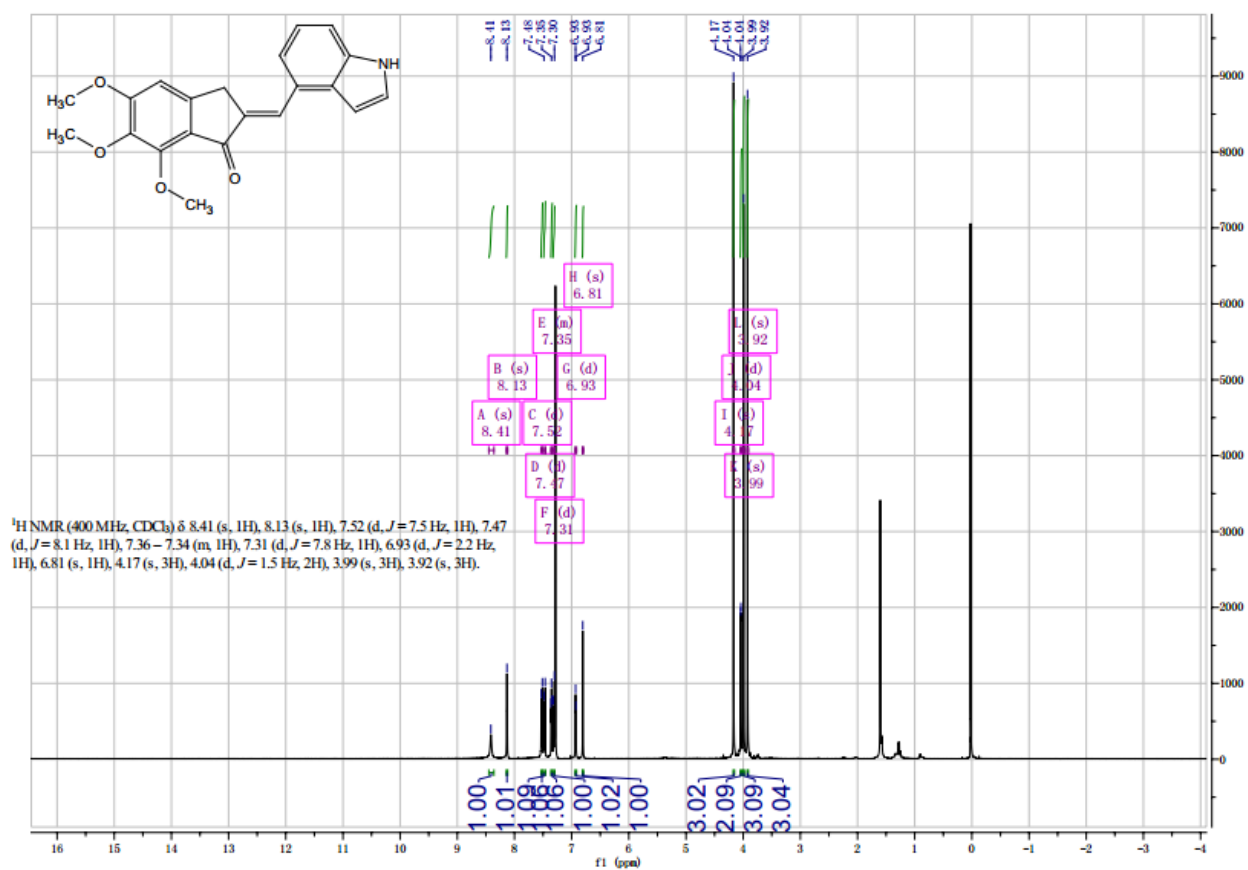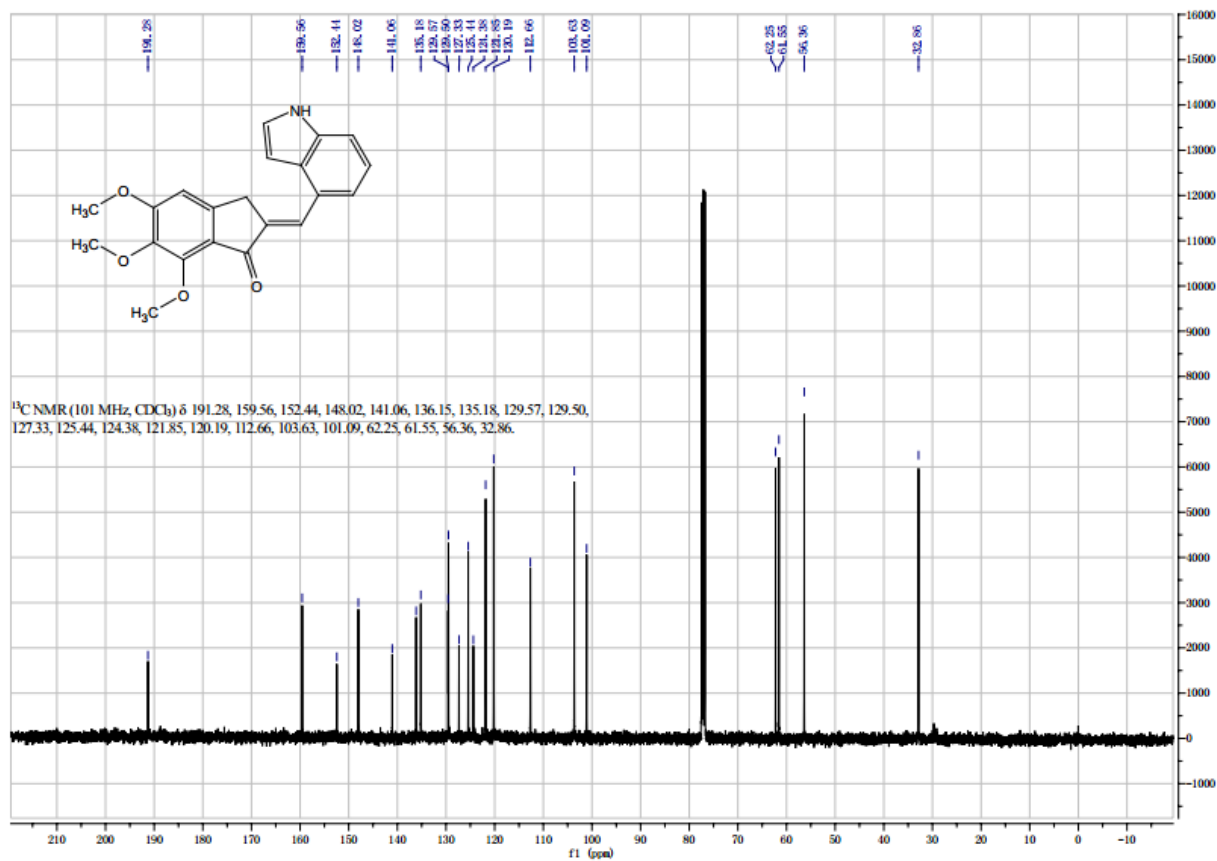

10d

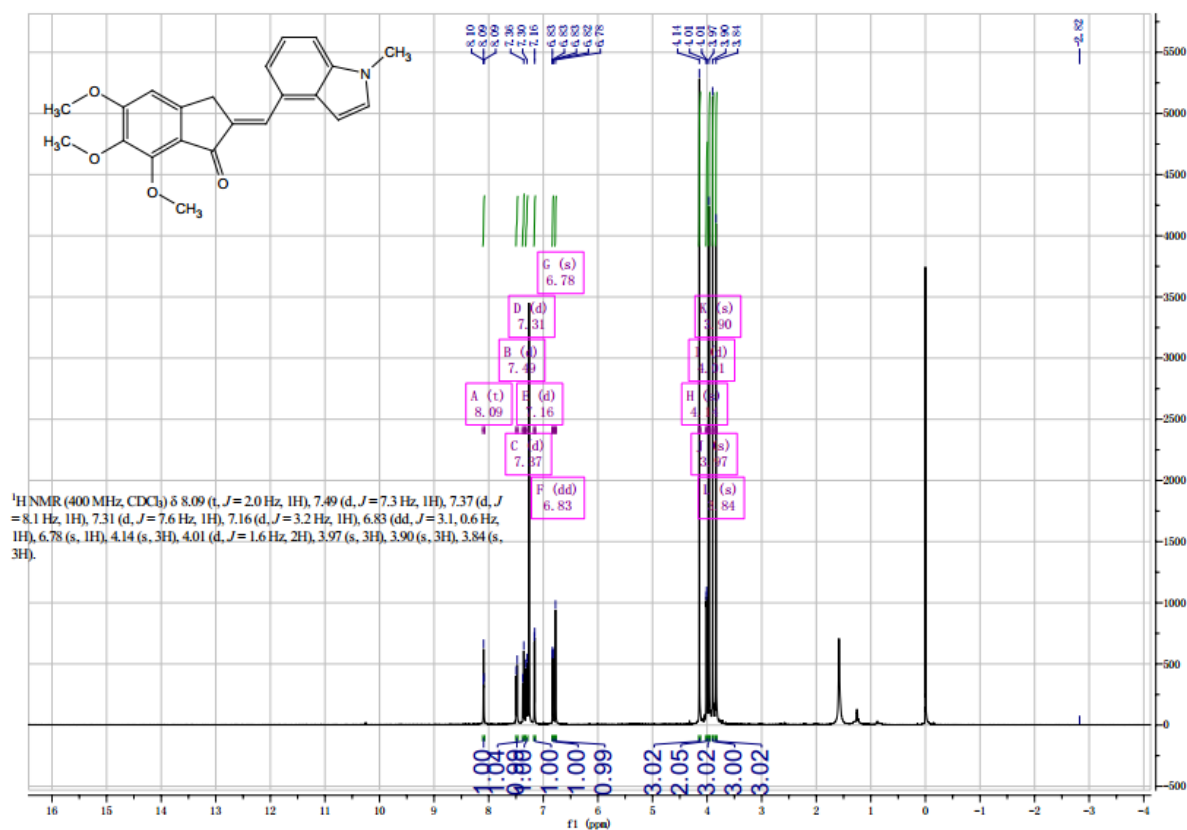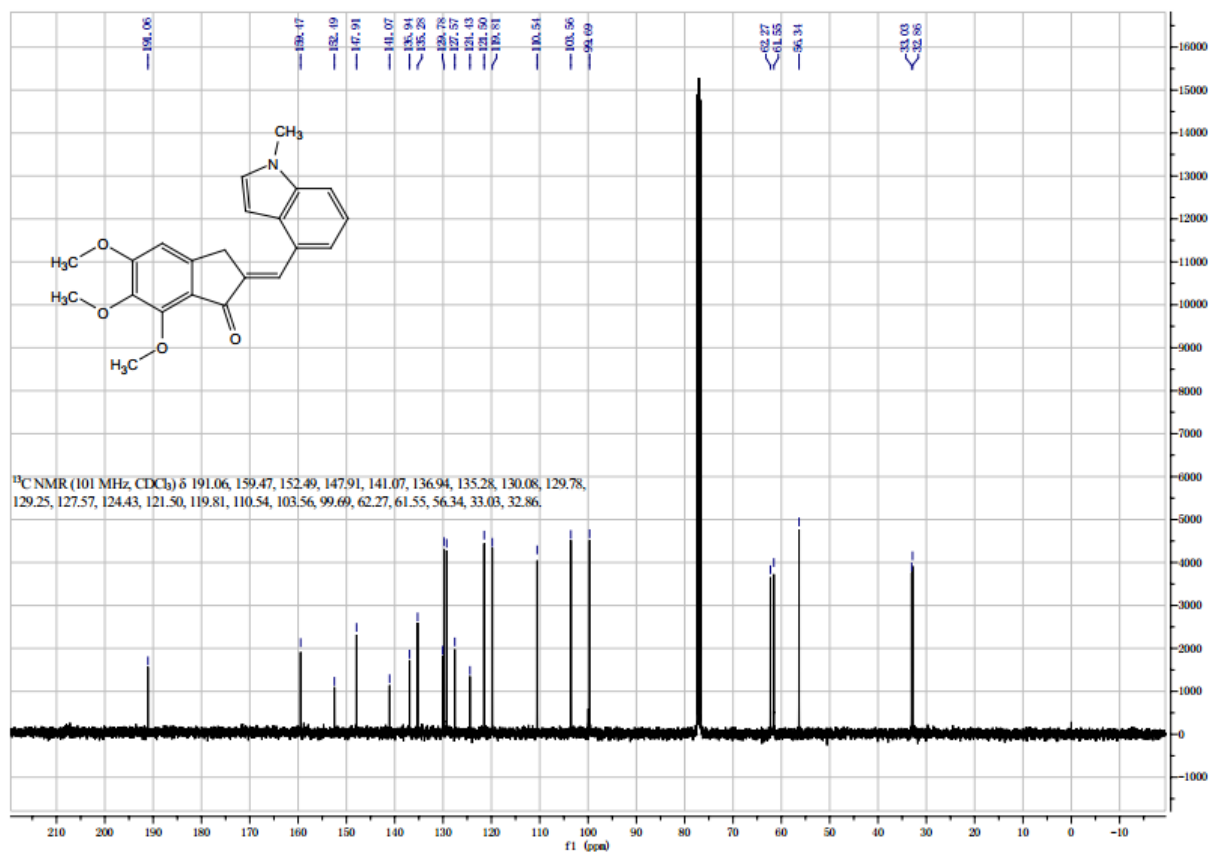

11a

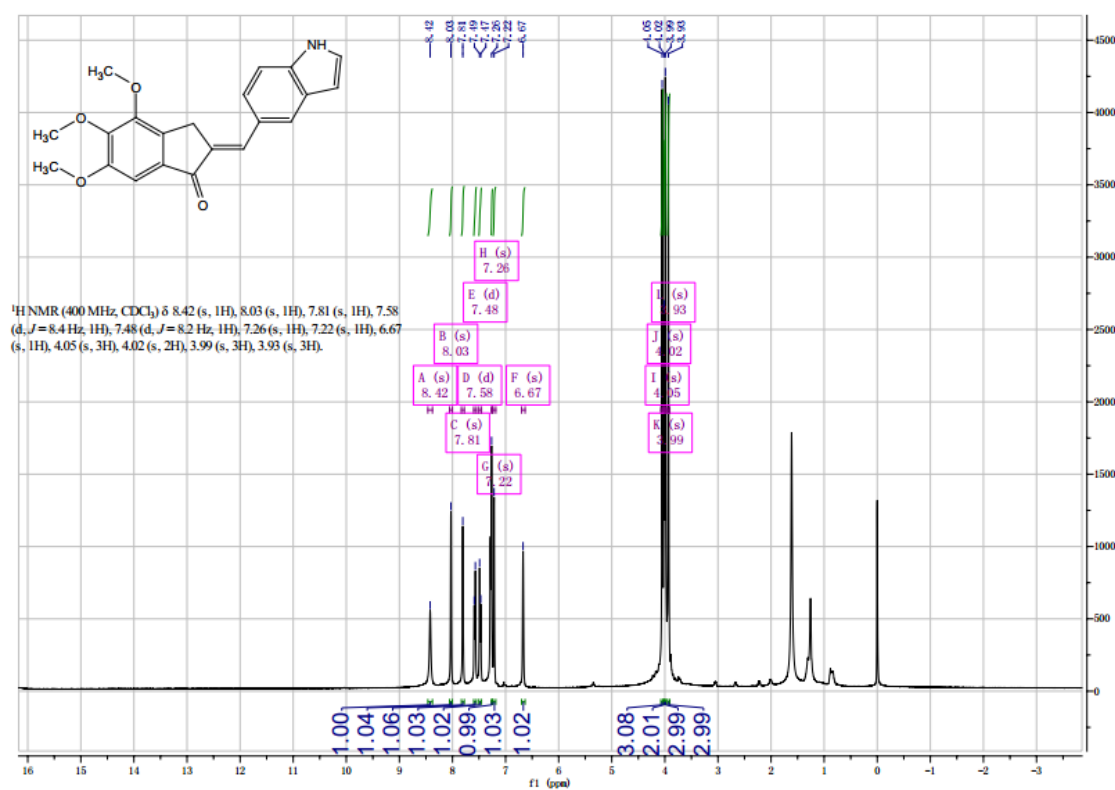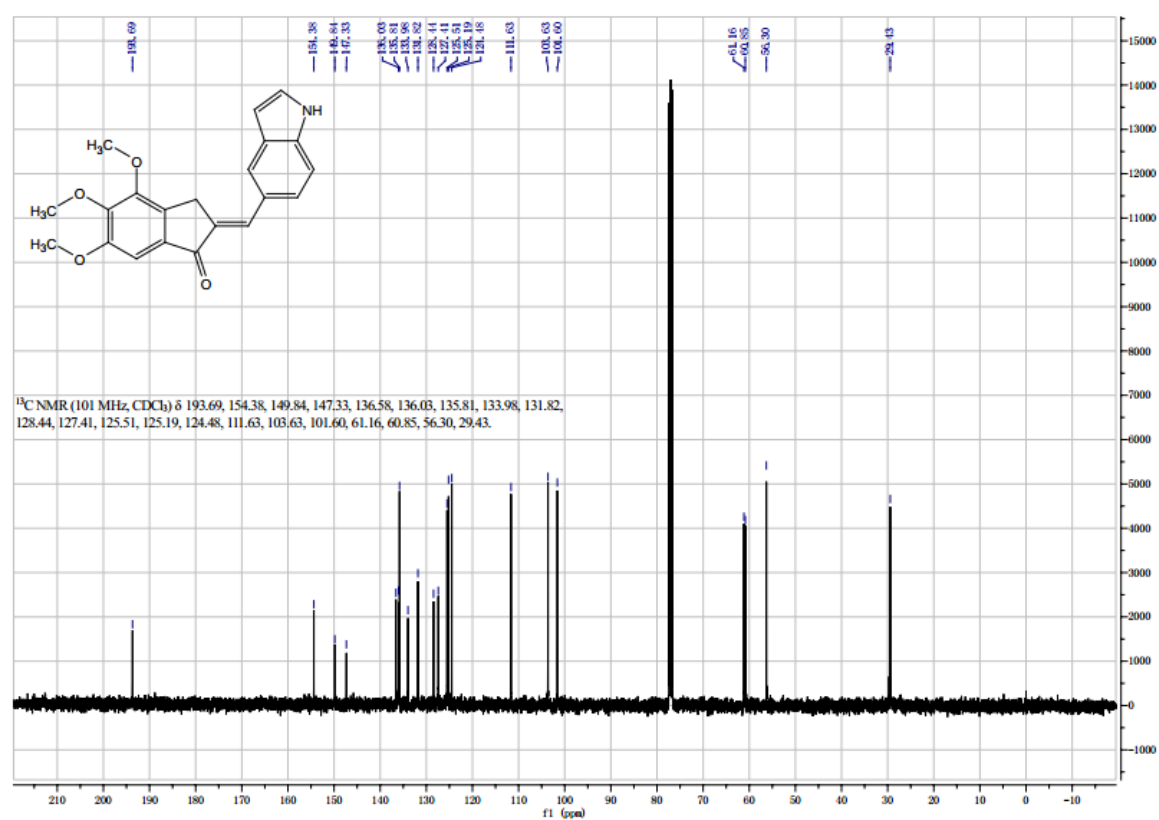

11b

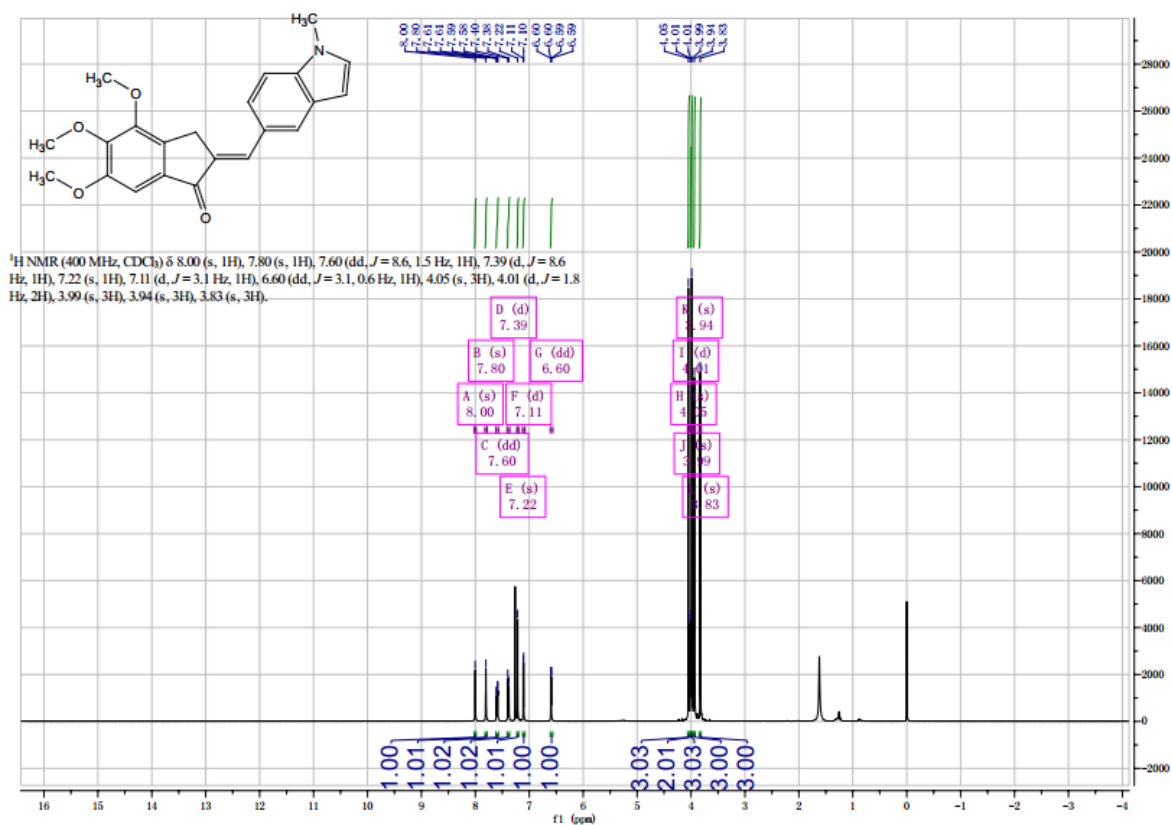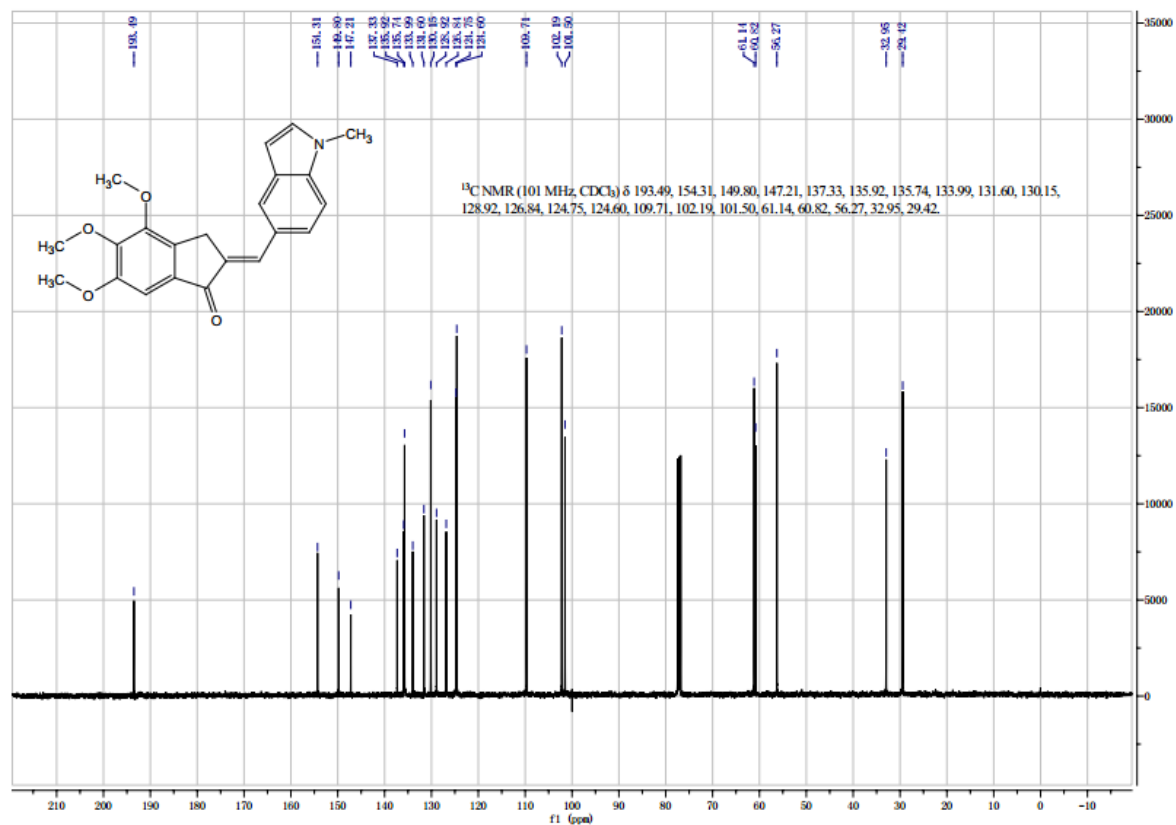

11c

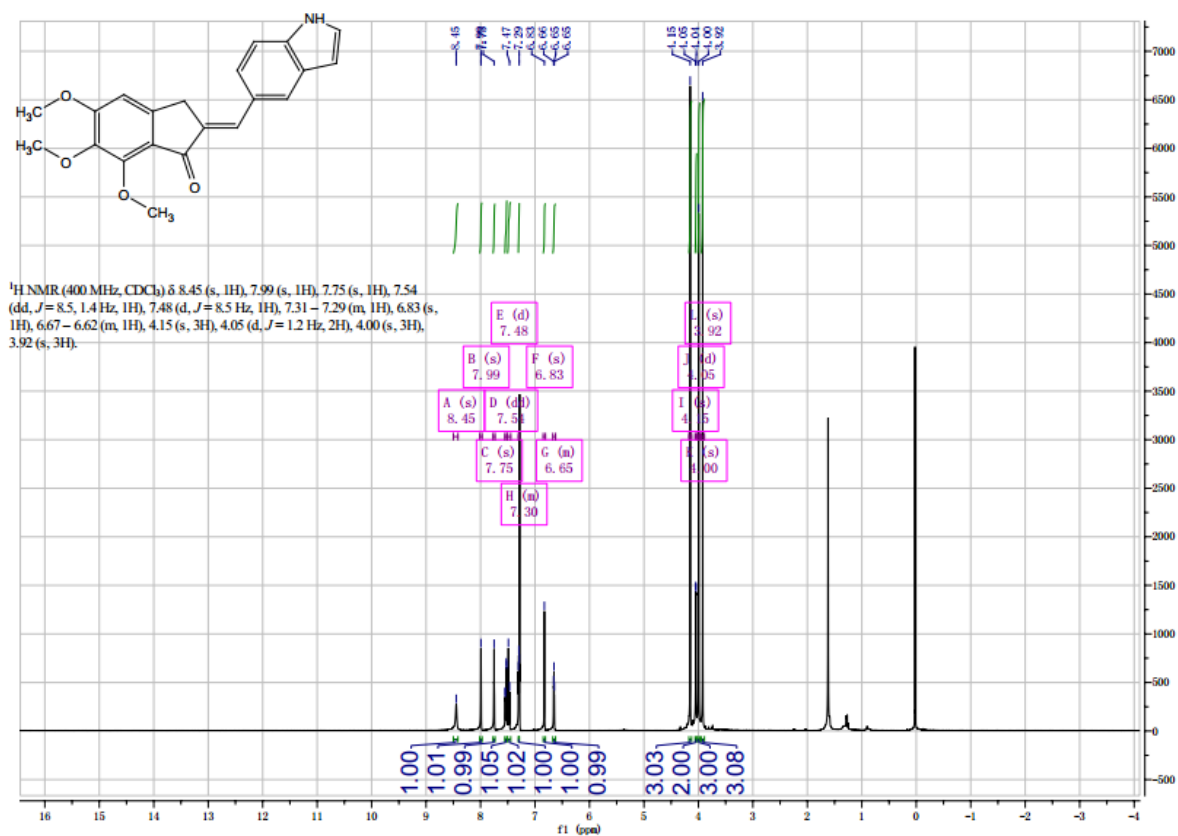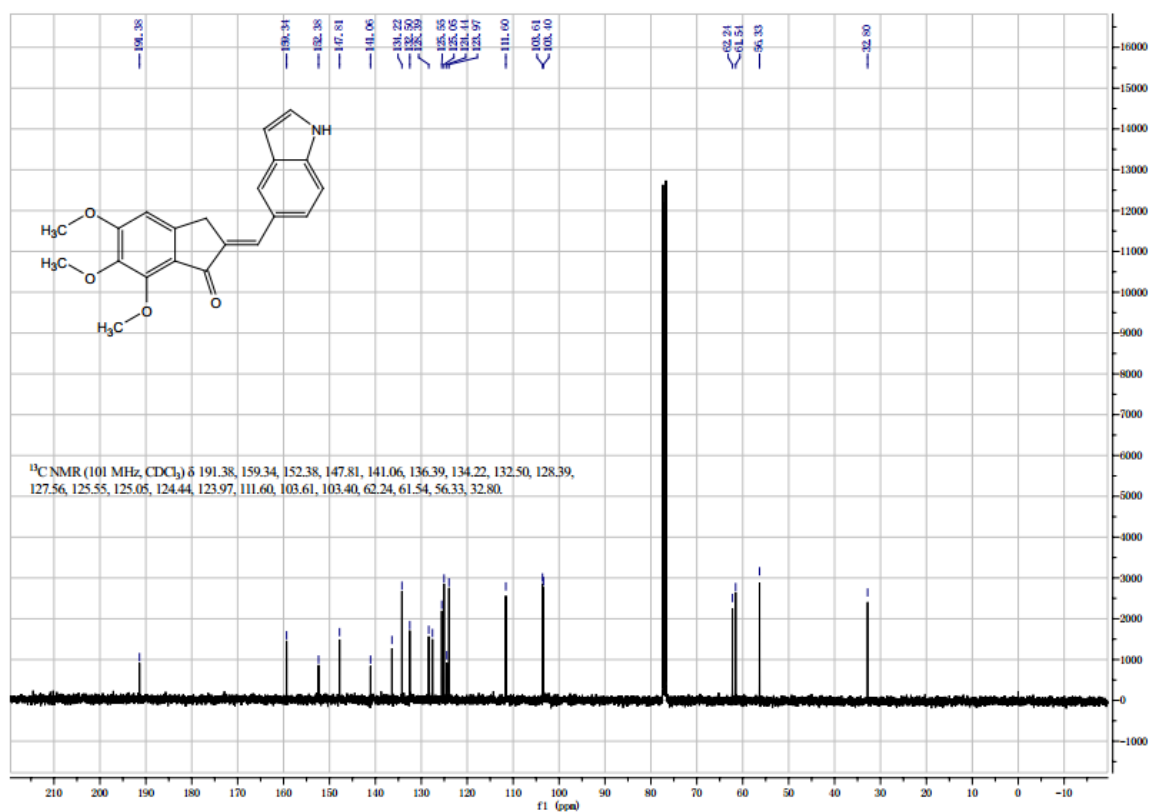

11d

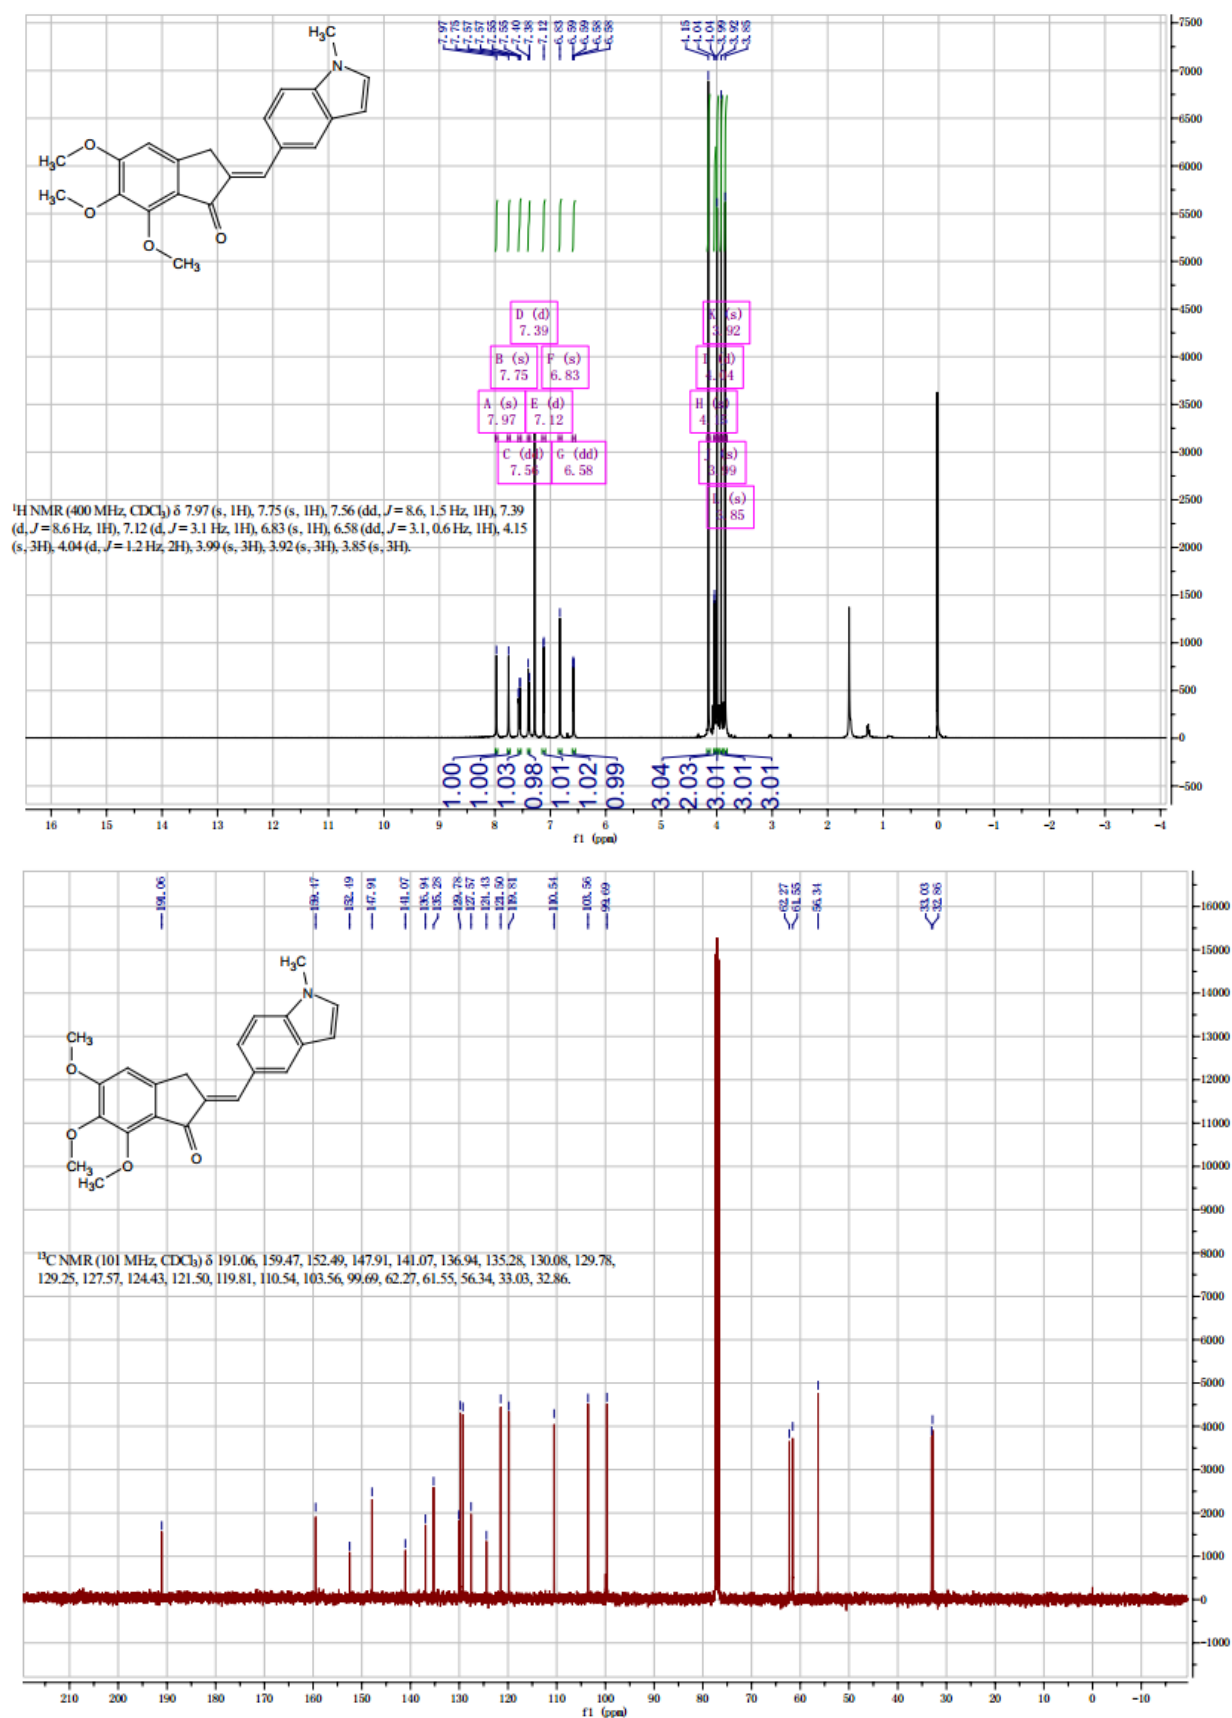

## S II. HPLC chromatograms of target compounds

8a

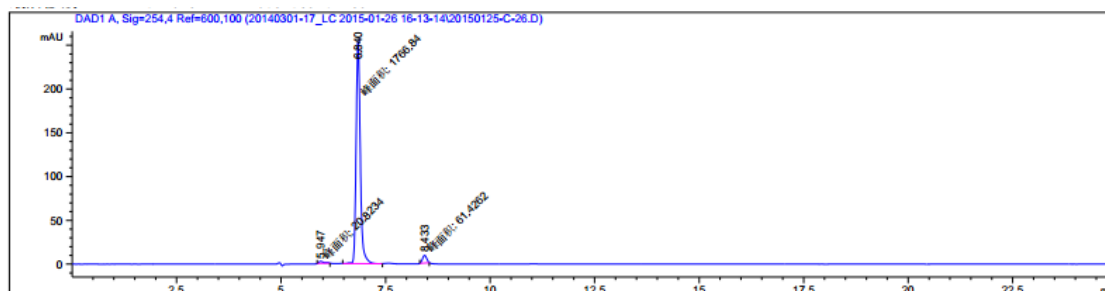

| Peak # | Retention time [min] | Type | Peak width [min] | Peak area [mAU*s] | Peak height [mAU] | Peak area % |
|--------|----------------------|------|------------------|-------------------|-------------------|-------------|
| 1      | 5.947                | MM   | 0.1528           | 20.82343          | 2.27158           | 1.1261      |
| 2      | 6.840                | MM   | 0.1164           | 1766.83618        | 252.99455         | 95.5519     |
| 3      | 8.433                | MM   | 0.1162           | 61.42618          | 8.81413           | 3.3220      |

8b

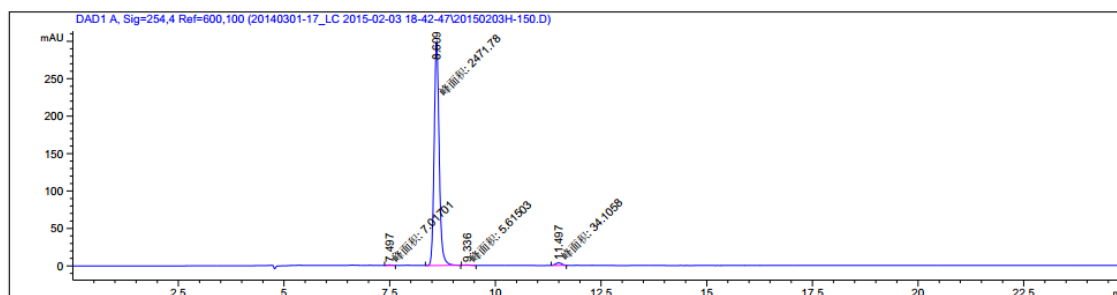

| Peak # | Retention time [min] | Type | Peak width [min] | Peak area [mAU*s] | Peak height [mAU] | Peak area % |
|--------|----------------------|------|------------------|-------------------|-------------------|-------------|
| 1      | 7.497                | MM   | 0.1580           | 7.01701           | 7.40000e-1        | 0.2786      |
| 2      | 8.609                | MM   | 0.1382           | 2471.78442        | 298.17245         | 98.1442     |
| 3      | 9.336                | MM   | 0.1755           | 5.61503           | 5.33199e-1        | 0.2229      |
| 4      | 11.497               | MM   | 0.1659           | 34.10582          | 3.42686           | 1.3542      |

8c

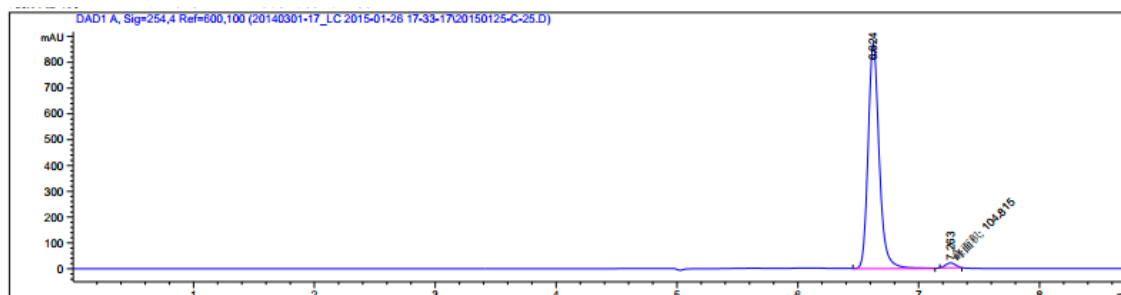



| Peak # | Retention time [min] | Type | Peak width [min] | Peak area [mAU*s] | Peak height [mAU] | Peak area % |
|--------|----------------------|------|------------------|-------------------|-------------------|-------------|
| 1      | 6.624                | VV   | 0.0966           | 5590.74316        | 874.41718         | 98.1597     |
| 2      | 7.263                | MM   | 0.0935           | 104.81483         | 18.68908          | 1.8403      |

8d

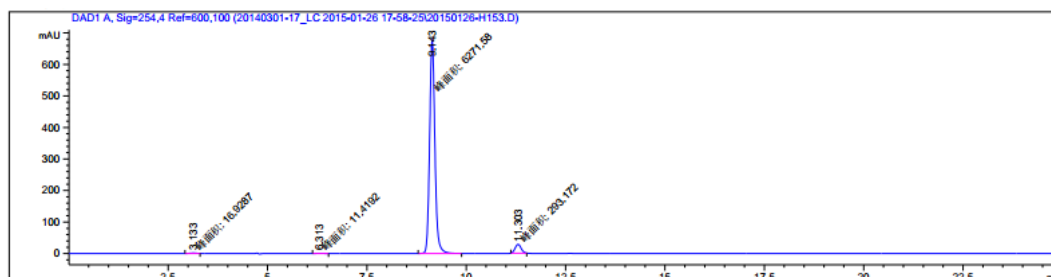

| Peak # | Retention time [min] | Type | Peak width [min] | Peak area [mAU*s] | Peak height [mAU] | Peak area % |
|--------|----------------------|------|------------------|-------------------|-------------------|-------------|
| 1      | 3.133                | MM   | 0.2036           | 16.92868          | 1.38594           | 0.2568      |
| 2      | 6.313                | MM   | 0.2386           | 11.41923          | 7.97671e-1        | 0.1732      |
| 3      | 9.143                | MM   | 0.1546           | 6271.58398        | 676.11389         | 95.1234     |
| 4      | 11.303               | MM   | 0.1740           | 293.17224         | 28.08739          | 4.4466      |

8e

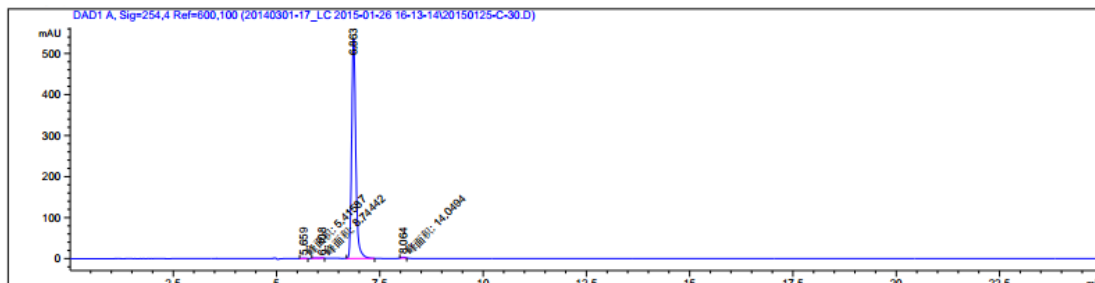

| Peak # | Retention time [min] | Type | Peak width [min] | Peak area [mAU*s] | Peak height [mAU] | Peak area % |
|--------|----------------------|------|------------------|-------------------|-------------------|-------------|
| 1      | 5.659                | MM   | 0.1147           | 5.41587           | 7.87158e-1        | 0.1435      |
| 2      | 6.108                | MM   | 0.1981           | 8.74442           | 7.35660e-1        | 0.2317      |
| 3      | 6.863                | BB   | 0.1076           | 3745.78003        | 535.80304         | 99.2525     |
| 4      | 8.064                | MM   | 0.1007           | 14.04943          | 2.32630           | 0.3723      |

8f

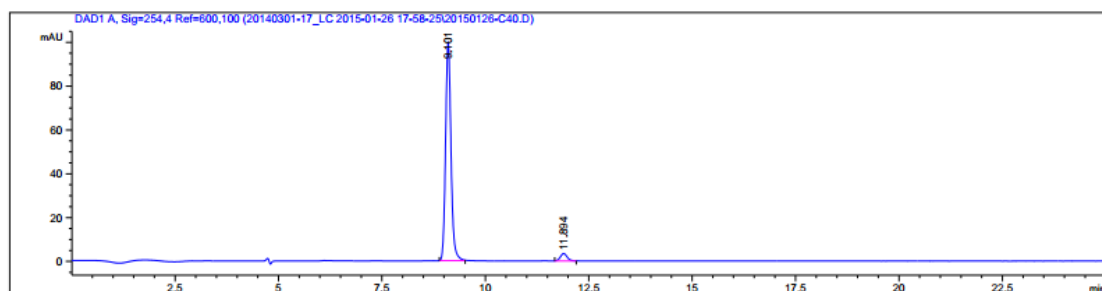

| Peak # | Retention time [min] | Type | Peak width [min] | Peak area [mAU*s] | Peak height [mAU] | Peak area % |
|--------|----------------------|------|------------------|-------------------|-------------------|-------------|
| 1      | 9.101                | BB   | 0.1383           | 908.48114         | 99.73994          | 95.9244     |
| 2      | 11.894               | BB   | 0.1785           | 38.59943          | 3.34932           | 4.0756      |

10a

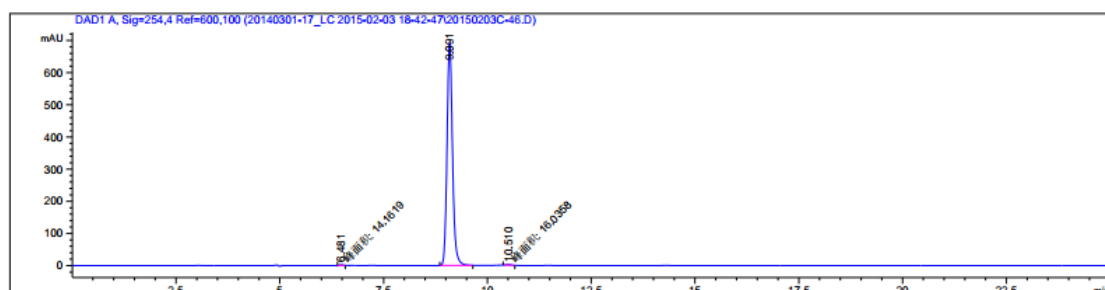

| Peak # | Retention time [min] | Type | Peak width [min] | Peak area [mAU*s] | Peak height [mAU] | Peak area % |
|--------|----------------------|------|------------------|-------------------|-------------------|-------------|
| 1      | 6.481                | MM   | 0.0983           | 14.16191          | 2.40131           | 0.2218      |
| 2      | 9.091                | BB   | 0.1414           | 6354.59326        | 690.33319         | 99.5270     |
| 3      | 10.510               | MM   | 0.1360           | 16.03581          | 1.96487           | 0.2512      |

10b

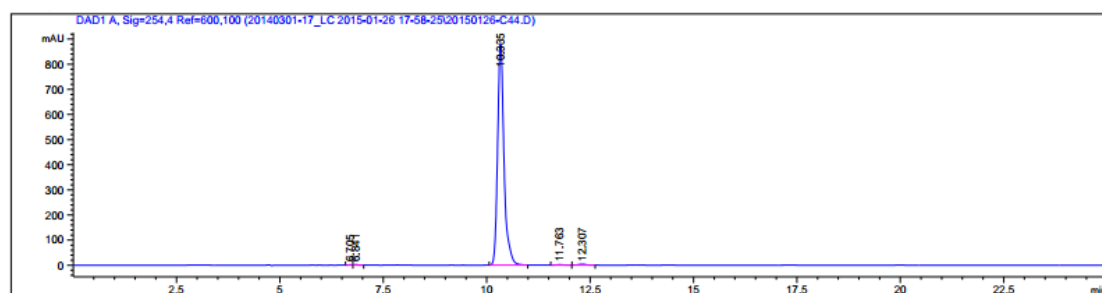

| Peak # | Retention time [min] | Type | Peak width [min] | Peak area [mAU*s] | Peak height [mAU] | Peak area % |
|--------|----------------------|------|------------------|-------------------|-------------------|-------------|
| 1      | 6.705                | BV   | 0.0909           | 11.25573          | 1.90643           | 0.1171      |
| 2      | 6.841                | VB   | 0.1086           | 18.00187          | 2.42609           | 0.1873      |
| 3      | 10.335               | BB   | 0.1638           | 9511.89551        | 882.10077         | 98.9496     |
| 4      | 11.763               | BB   | 0.1880           | 23.20288          | 1.87931           | 0.2414      |
| 5      | 12.307               | BB   | 0.1955           | 48.50996          | 3.73635           | 0.5046      |

10c

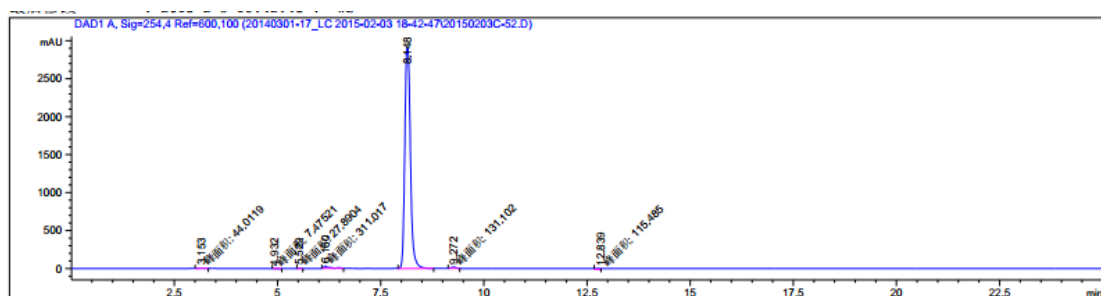

| Peak # | Retention time [min] | Type | Peak width [min] | Peak area [mAU*s] | Peak height [mAU] | Peak area % |
|--------|----------------------|------|------------------|-------------------|-------------------|-------------|
| 1      | 3.153                | MM   | 0.1831           | 44.01191          | 4.00534           | 0.1558      |
| 2      | 4.932                | MM   | 0.0996           | 7.47521           | 1.25040           | 0.0265      |
| 3      | 5.529                | MM   | 0.0857           | 27.89041          | 5.42169           | 0.0987      |
| 4      | 6.160                | MM   | 0.1805           | 311.01740         | 28.71350          | 1.1011      |
| 5      | 8.148                | VB   | 0.1487           | 2.76086e4         | 2910.15405        | 97.7448     |
| 6      | 9.272                | MM   | 0.1377           | 131.10223         | 15.86812          | 0.4642      |
| 7      | 12.839               | MM   | 0.1186           | 115.48467         | 16.22391          | 0.4089      |

10d

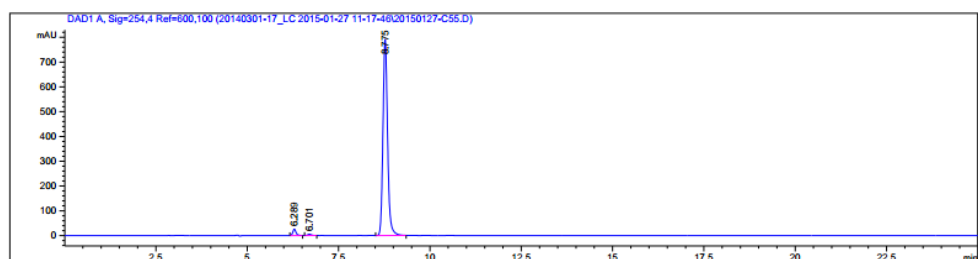

| Peak # | Retention time [min] | Type | Peak width [min] | Peak area [mAU*s] | Peak height [mAU] | Peak area % |
|--------|----------------------|------|------------------|-------------------|-------------------|-------------|
| 1      | 6.289                | BB   | 0.0961           | 158.81326         | 25.71469          | 2.2162      |
| 2      | 6.701                | BB   | 0.1063           | 37.10743          | 5.25904           | 0.5178      |
| 3      | 8.775                | VB   | 0.1348           | 6970.19092        | 791.03973         | 97.2660     |

11a

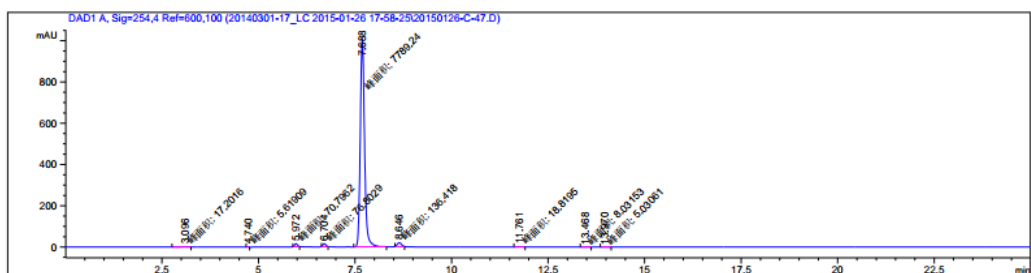

| Peak | Retention time | Type | Peak width | Peak area | Peak height | Peak area |
|------|----------------|------|------------|-----------|-------------|-----------|
|------|----------------|------|------------|-----------|-------------|-----------|

| #                                         | [min]  |    | [min]  | [mAU*s]    | [mAU]      | %       |
|-------------------------------------------|--------|----|--------|------------|------------|---------|
| ----- ----- ----- ----- ----- ----- ----- |        |    |        |            |            |         |
| 1                                         | 3.096  | MM | 0.2171 | 17.20162   | 1.32028    | 0.2116  |
| 2                                         | 4.740  | MM | 0.0632 | 5.61909    | 1.48231    | 0.0691  |
| 3                                         | 5.972  | MM | 0.0837 | 70.79625   | 14.10119   | 0.8710  |
| 4                                         | 6.704  | MM | 0.0915 | 76.80293   | 13.99040   | 0.9449  |
| 5                                         | 7.688  | MM | 0.1294 | 7789.24072 | 1002.89917 | 95.8327 |
| 6                                         | 8.646  | MM | 0.1229 | 136.41814  | 18.49550   | 1.6784  |
| 7                                         | 11.761 | MM | 0.1897 | 18.81947   | 1.65361    | 0.2315  |
| 8                                         | 13.468 | MM | 0.2662 | 8.03153    | 5.02806e-1 | 0.0988  |
| 9                                         | 13.970 | MM | 0.1882 | 5.03061    | 3.37868e-1 | 0.0619  |

11b

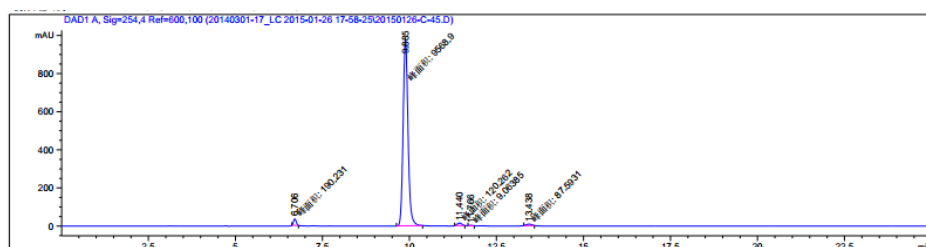

| Peak                                      | Retention time | Type | Peak width | Peak area  | Peak height | Peak area |
|-------------------------------------------|----------------|------|------------|------------|-------------|-----------|
| ----- ----- ----- ----- ----- ----- ----- |                |      |            |            |             |           |
| #                                         | [min]          |      | [min]      | [mAU*s]    | [mAU]       | %         |
| ----- ----- ----- ----- ----- ----- ----- |                |      |            |            |             |           |
| 1                                         | 6.706          | MM   | 0.0937     | 190.23053  | 33.82433    | 1.9069    |
| 2                                         | 9.885          | MM   | 0.1632     | 9568.90137 | 977.41876   | 95.9187   |
| 3                                         | 11.440         | MM   | 0.1527     | 120.26173  | 13.13027    | 1.2055    |
| 4                                         | 11.766         | MM   | 0.1073     | 9.06385    | 1.40734     | 0.0909    |
| 5                                         | 13.438         | MM   | 0.1858     | 87.59314   | 7.85670     | 0.8780    |

11c

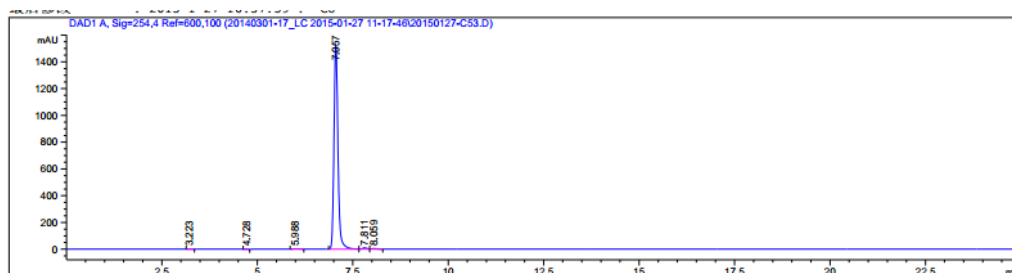

| Peak                                      | Retention time | Type | Peak width | Peak area | Peak height | Peak area |
|-------------------------------------------|----------------|------|------------|-----------|-------------|-----------|
| ----- ----- ----- ----- ----- ----- ----- |                |      |            |           |             |           |
| #                                         | [min]          |      | [min]      | [mAU*s]   | [mAU]       | %         |
| ----- ----- ----- ----- ----- ----- ----- |                |      |            |           |             |           |
| 1                                         | 3.223          | BB   | 0.0818     | 7.40275   | 1.31160     | 0.0655    |
| 2                                         | 4.728          | BV   | 0.0906     | 16.64960  | 2.83334     | 0.1473    |
| 3                                         | 5.988          | BV   | 0.1468     | 29.86816  | 2.74786     | 0.2642    |
| 4                                         | 7.057          | BV   | 0.1130     | 1.11380e4 | 1529.22986  | 98.5142   |
| 5                                         | 7.811          | VV   | 0.1245     | 75.73344  | 9.15919     | 0.6699    |
| 6                                         | 8.059          | VB   | 0.1448     | 38.32880  | 4.03567     | 0.3390    |

11d

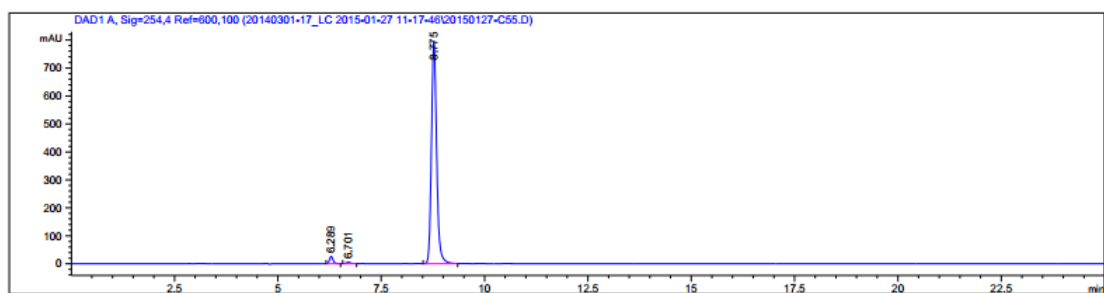

| Peak # | Retention time [min] | Type | Peak width [min] | Peak area [mAU*s] | Peak height [mAU] | Peak area % |
|--------|----------------------|------|------------------|-------------------|-------------------|-------------|
| 1      | 6.289                | BB   | 0.0961           | 158.81326         | 25.71469          | 2.2162      |
| 2      | 6.701                | BB   | 0.1063           | 37.10743          | 5.25904           | 0.5178      |
| 3      | 8.775                | VB   | 0.1348           | 6970.19092        | 791.03973         | 97.2660     |

### III. High resolution mass spectra of target compounds

8a

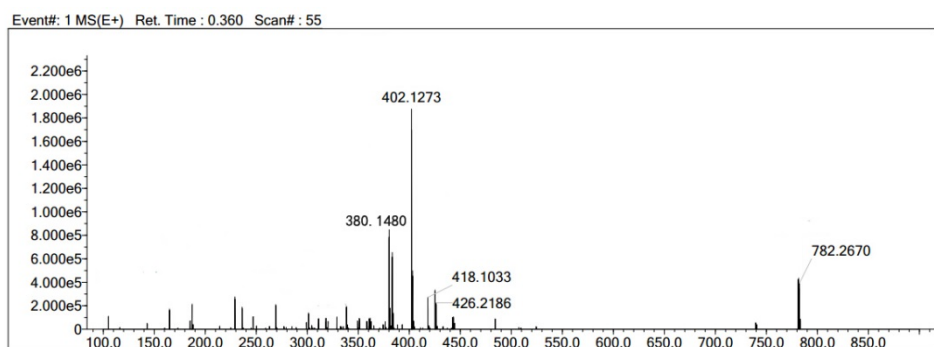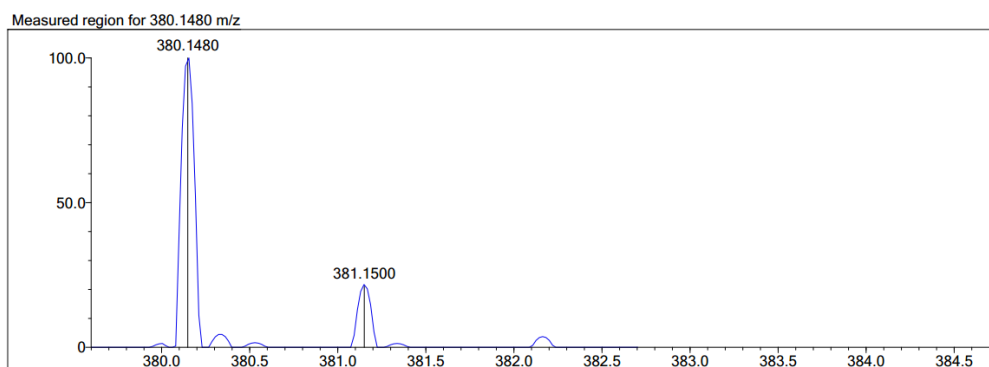

| Rank | Score | Formula (M)  | Ion                | Meas. m/z | Pred. m/z | Df. (mDa) | Df. (ppm) | Iso   | DBE  |
|------|-------|--------------|--------------------|-----------|-----------|-----------|-----------|-------|------|
| 2    | 85.07 | C22 H21 N O5 | [M+H] <sup>+</sup> | 380.1480  | 380.1492  | -1.2      | -3.16     | 89.92 | 13.0 |

8b

Event#: 1 MS(E+) Ret. Time : 0.387 Scan#: 59

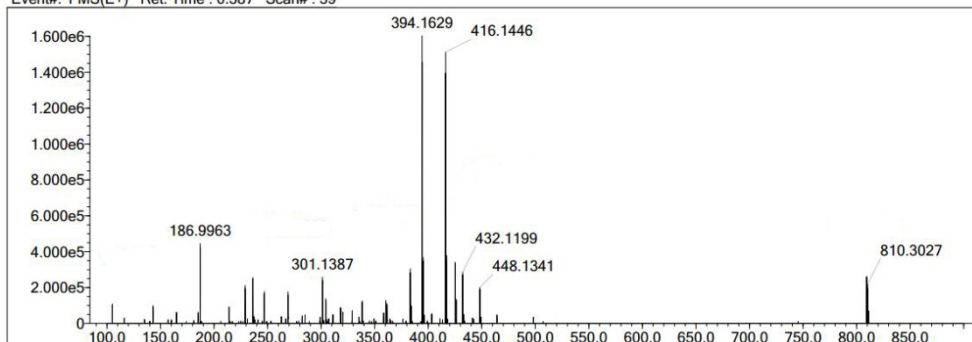

Measured region for 394.1629 m/z

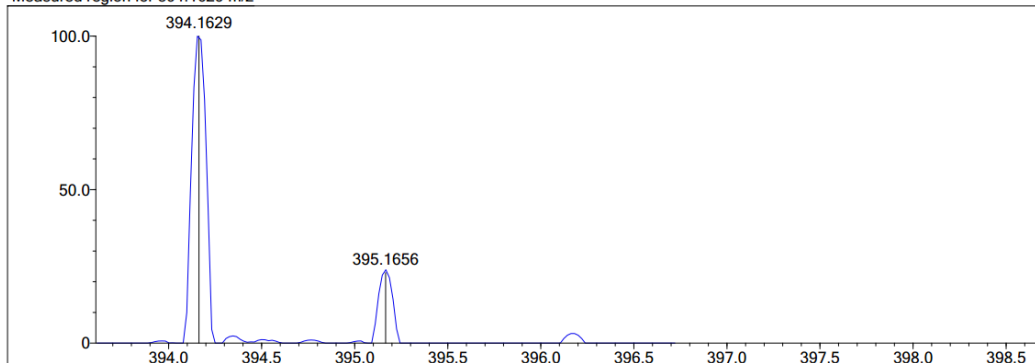

| Rank | Score | Formula (M)  | Ion                | Meas. m/z | Pred. m/z | Df. (mDa) | Df. (ppm) | Iso   | DBE  |
|------|-------|--------------|--------------------|-----------|-----------|-----------|-----------|-------|------|
| 1    | 84.53 | C23 H23 N O5 | [M+H] <sup>+</sup> | 394.1629  | 394.1649  | -2.0      | -5.07     | 94.66 | 13.0 |

8c

Event#: 1 MS(E+) Ret. Time : 0.373 Scan#: 57

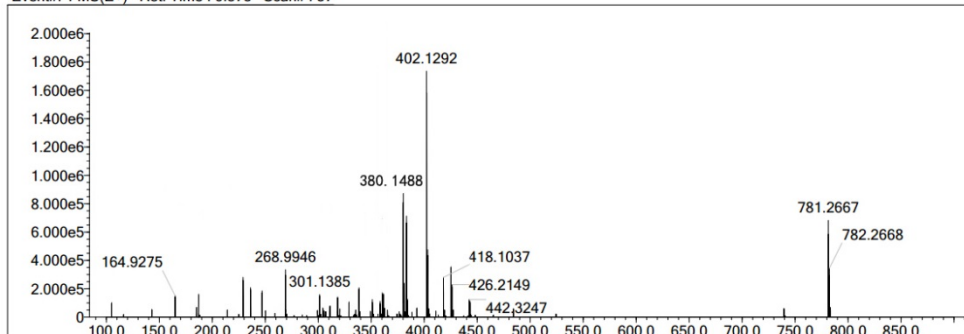

Measured region for 380.1488 m/z

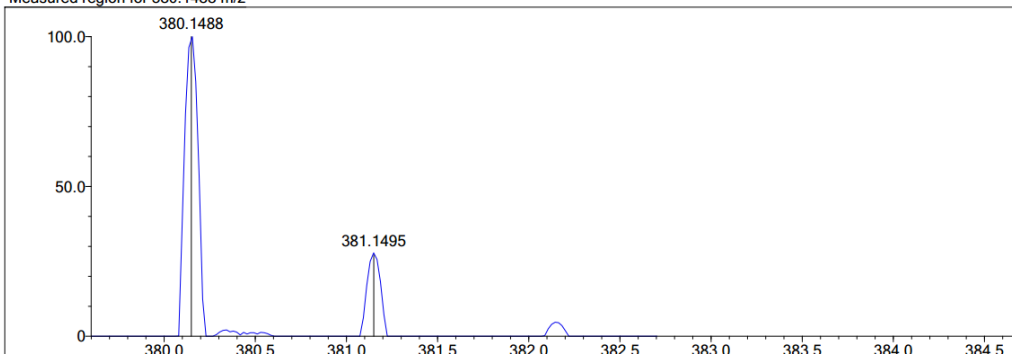

| Rank | Score | Formula (M)  | Ion                | Meas. m/z | Pred. m/z | Df. (mDa) | Df. (ppm) | Iso   | DBE  |
|------|-------|--------------|--------------------|-----------|-----------|-----------|-----------|-------|------|
| 1    | 87.39 | C22 H21 N O5 | [M+H] <sup>+</sup> | 380.1488  | 380.1492  | -0.4      | -1.05     | 87.50 | 13.0 |

8d

Event#: 1 MS(E+) Ret. Time : 0.413 Scan#: 63

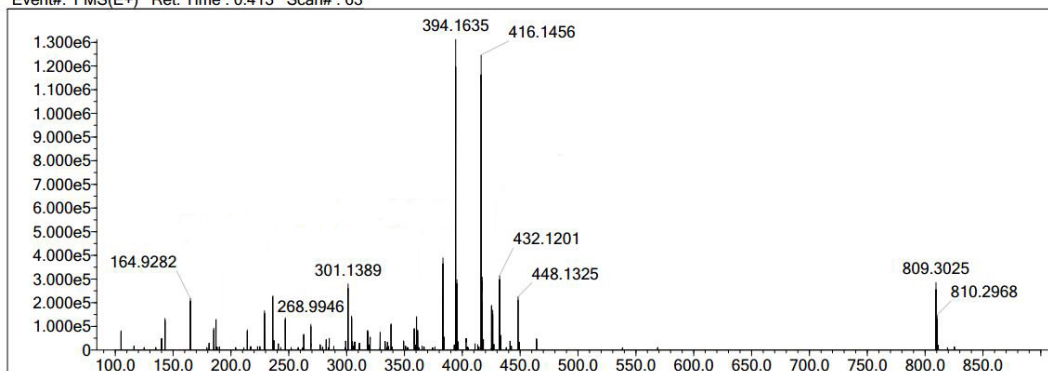

Measured region for 394.1635 m/z

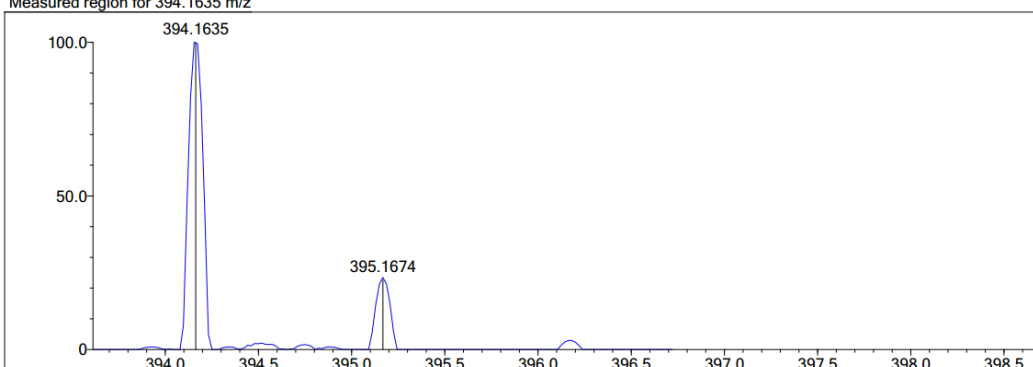

| Rank | Score | Formula (M)  | Ion                | Meas. m/z | Pred. m/z | Df. (mDa) | Df. (ppm) | Iso   | DBE  |
|------|-------|--------------|--------------------|-----------|-----------|-----------|-----------|-------|------|
| 1    | 89.78 | C23 H23 N O5 | [M+H] <sup>+</sup> | 394.1635  | 394.1649  | -1.4      | -3.55     | 95.89 | 13.0 |

8e

Event#: 1 MS(E+) Ret. Time : 0.400 Scan#: 61

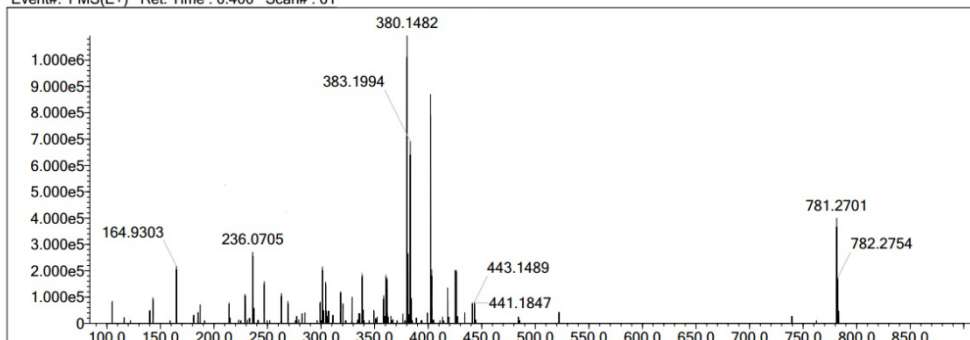

Measured region for 380.1482 m/z

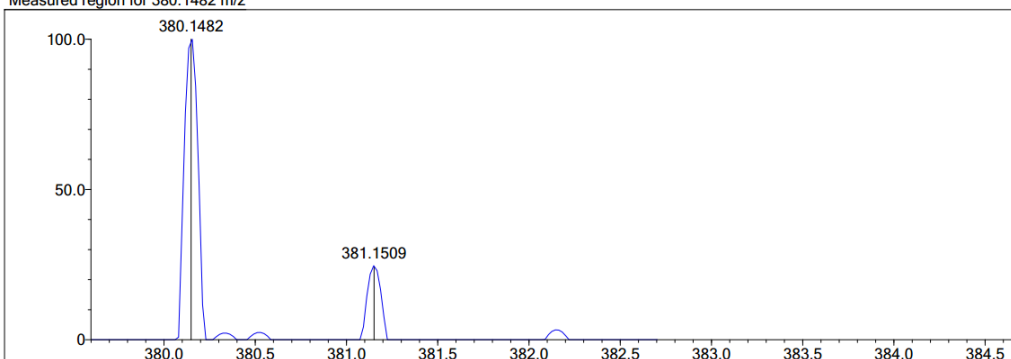

| Rank | Score | Formula (M)  | Ion                | Meas. m/z | Pred. m/z | Df. (mDa) | Df. (ppm) | Iso   | DBE  |
|------|-------|--------------|--------------------|-----------|-----------|-----------|-----------|-------|------|
| 2    | 85.98 | C22 H21 N O5 | [M+H] <sup>+</sup> | 380.1482  | 380.1492  | -1.0      | -2.63     | 89.63 | 13.0 |

8f

Event#: 1 MS(E+) Ret. Time : 0.347 -&gt; 0.347 Scan#: 53 -&gt; 53

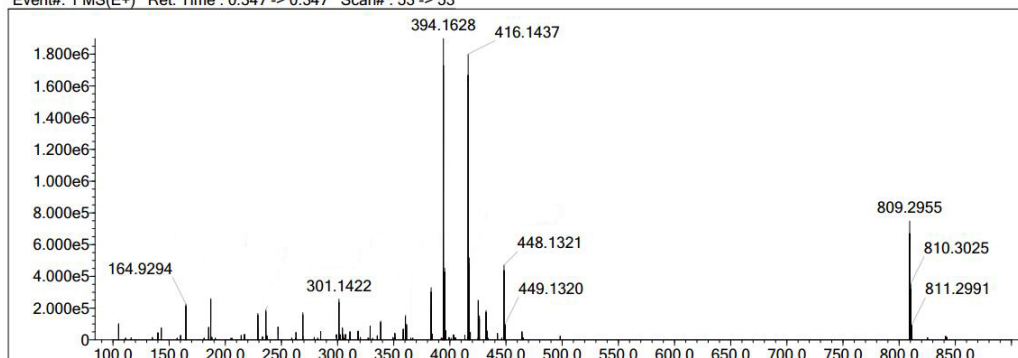

Measured region for 394.1628 m/z

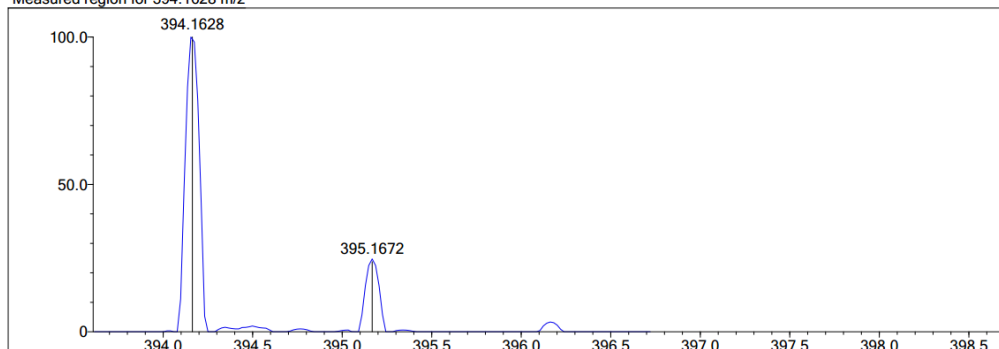

| Rank | Score | Formula (M)  | Ion                | Meas. m/z | Pred. m/z | Df. (mDa) | Df. (ppm) | Iso   | DBE  |
|------|-------|--------------|--------------------|-----------|-----------|-----------|-----------|-------|------|
| 3    | 76.43 | C23 H23 N O5 | [M+H] <sup>+</sup> | 394.1628  | 394.1649  | -2.1      | -5.33     | 88.16 | 13.0 |

10a

Event#: 1 MS(E+) Ret. Time : 0.480 Scan#: 73

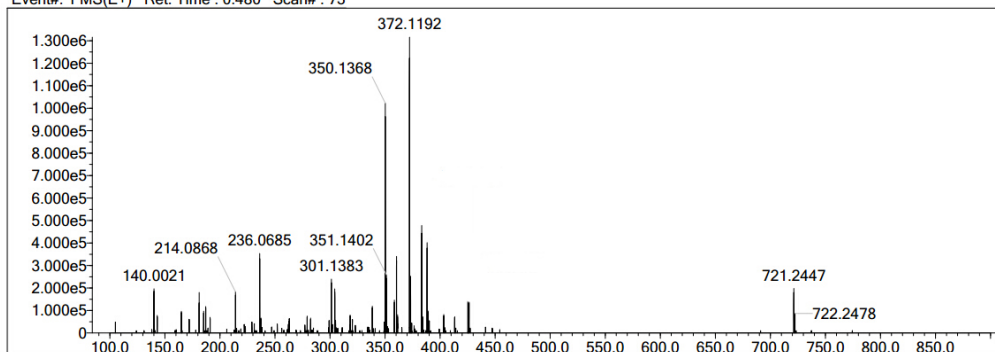

Measured region for 372.1192 m/z

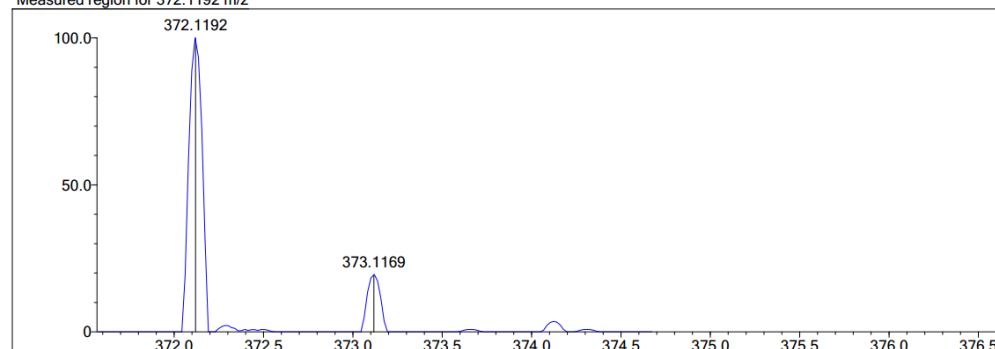

| Rank | Score | Formula (M)  | Ion                 | Meas. m/z | Pred. m/z | Df. (mDa) | Df. (ppm) | Iso   | DBE  |
|------|-------|--------------|---------------------|-----------|-----------|-----------|-----------|-------|------|
| 2    | 69.02 | C21 H19 N O4 | [M+Na] <sup>+</sup> | 372.1192  | 372.1206  | -1.4      | -3.76     | 74.14 | 13.0 |



## 10b

Event#: 1 MS(E+) Ret. Time : 0.440 Scan#: 67

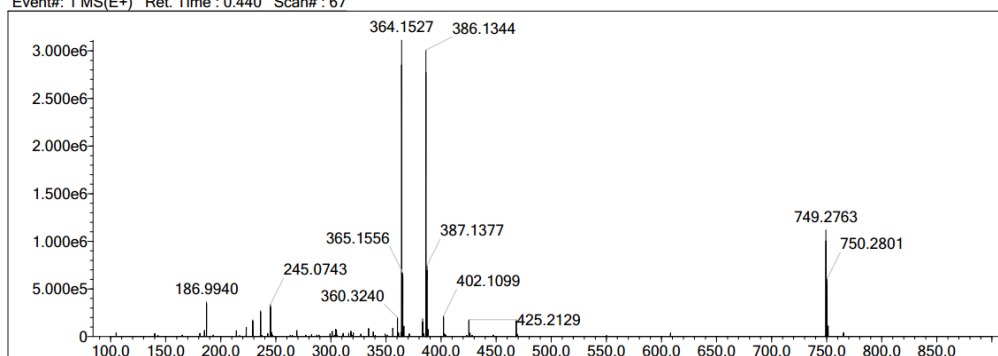

Measured region for 364.1527 m/z

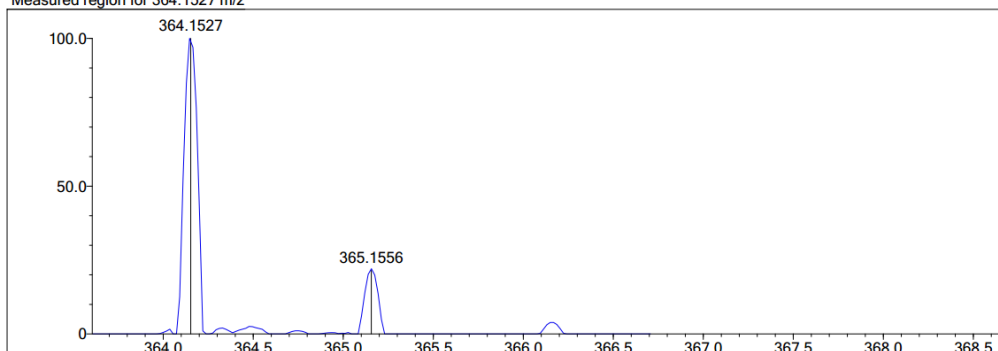

| Rank | Score | Formula (M)  | Ion                | Meas. m/z | Pred. m/z | Df. (mDa) | Df. (ppm) | Iso   | DBE  |
|------|-------|--------------|--------------------|-----------|-----------|-----------|-----------|-------|------|
| 1    | 83.95 | C22 H21 N O4 | [M+H] <sup>+</sup> | 364.1527  | 364.1543  | -1.6      | -4.39     | 91.73 | 13.0 |

## 10c

Event#: 1 MS(E+) Ret. Time : 0.533 Scan#: 81

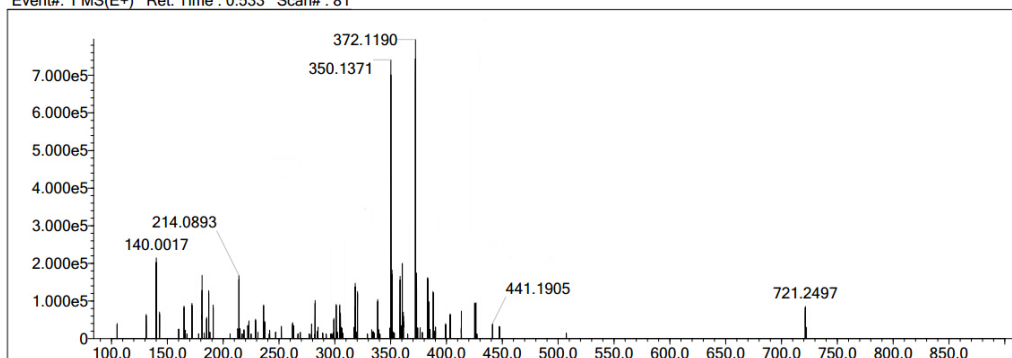

Measured region for 372.1190 m/z

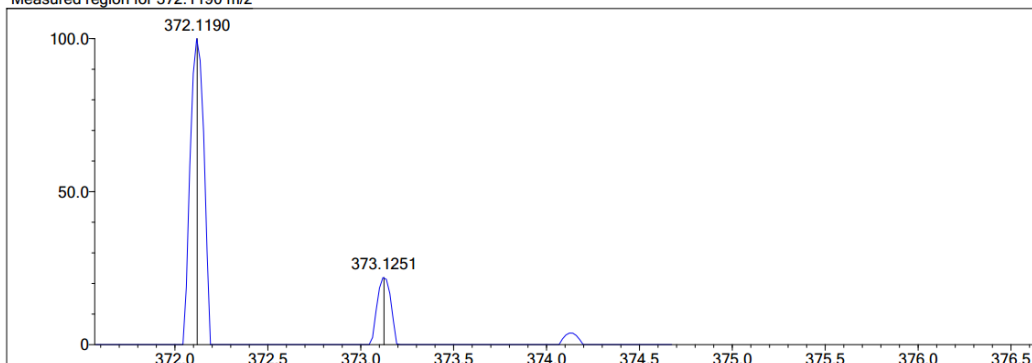

| Rank | Score | Formula (M)  | Ion                 | Meas. m/z | Pred. m/z | Df. (mDa) | Df. (ppm) | Iso   | DBE  |
|------|-------|--------------|---------------------|-----------|-----------|-----------|-----------|-------|------|
| 2    | 76.86 | C21 H19 N O4 | [M+Na] <sup>+</sup> | 372.1190  | 372.1206  | -1.6      | -4.30     | 83.77 | 13.0 |

10d

Event#: 1 MS(E+) Ret. Time : 0.573 Scan#: 87

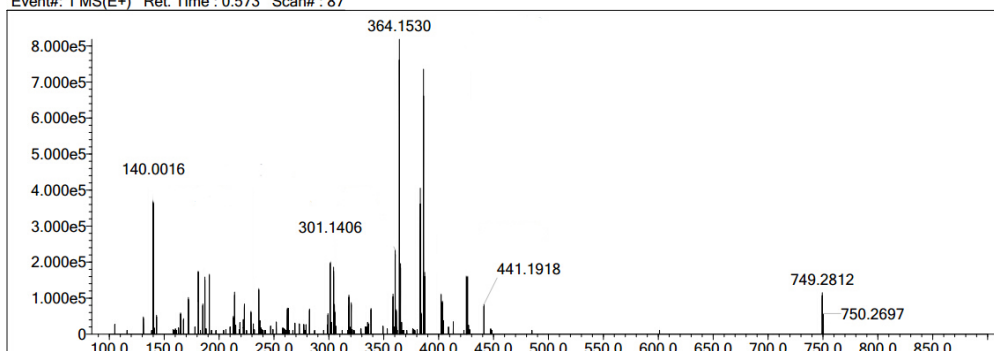

Measured region for 364.1530 m/z

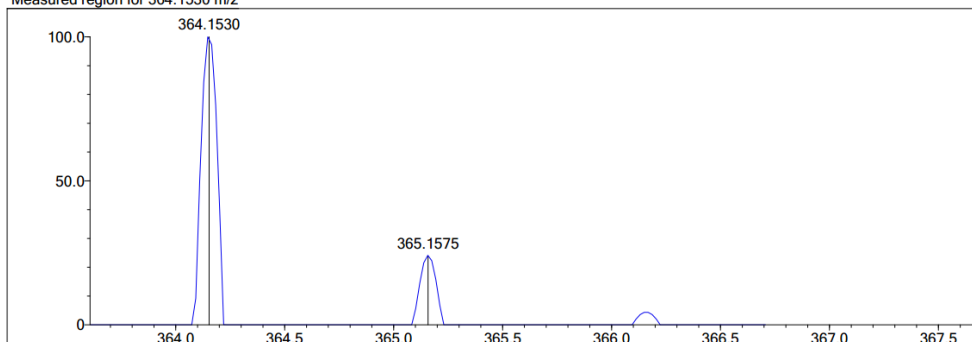

| Rank | Score | Formula (M)  | Ion                | Meas. m/z | Pred. m/z | Df. (mDa) | Df. (ppm) | Iso   | DBE  |
|------|-------|--------------|--------------------|-----------|-----------|-----------|-----------|-------|------|
| 1    | 85.43 | C22 H21 N O4 | [M+H] <sup>+</sup> | 364.1530  | 364.1543  | -1.3      | -3.57     | 91.30 | 13.0 |

11a

Event#: 1 MS(E+) Ret. Time : 0.253 Scan#: 39

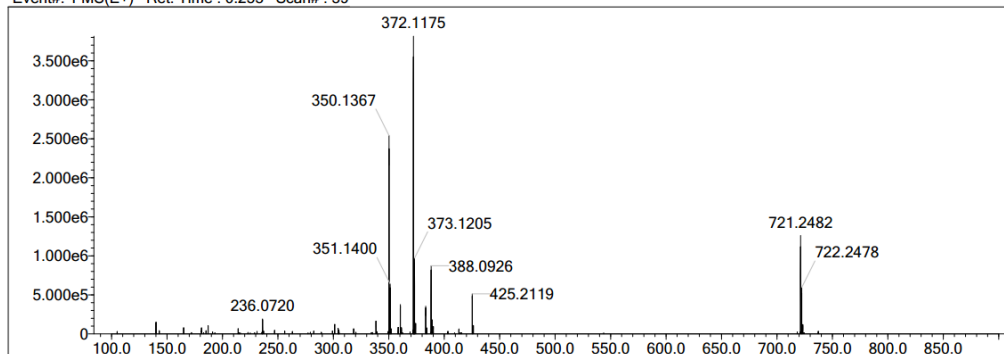

Measured region for 350.1367 m/z

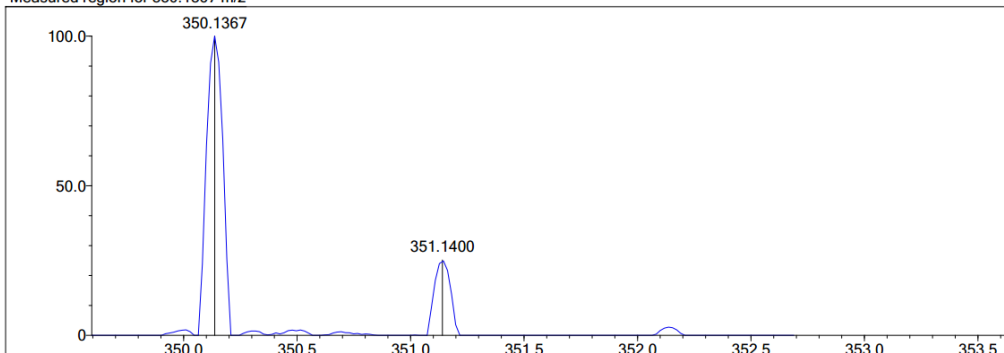

| Rank | Score | Formula (M)  | Ion                | Meas. m/z | Pred. m/z | Df. (mDa) | Df. (ppm) | Iso   | DBE  |
|------|-------|--------------|--------------------|-----------|-----------|-----------|-----------|-------|------|
| 1    | 62.51 | C21 H19 N O4 | [M+H] <sup>+</sup> | 350.1367  | 350.1387  | -2.0      | -5.71     | 75.40 | 13.0 |

11b

Event#: 1 MS(E+) Ret. Time : 0.280 Scan#: 43

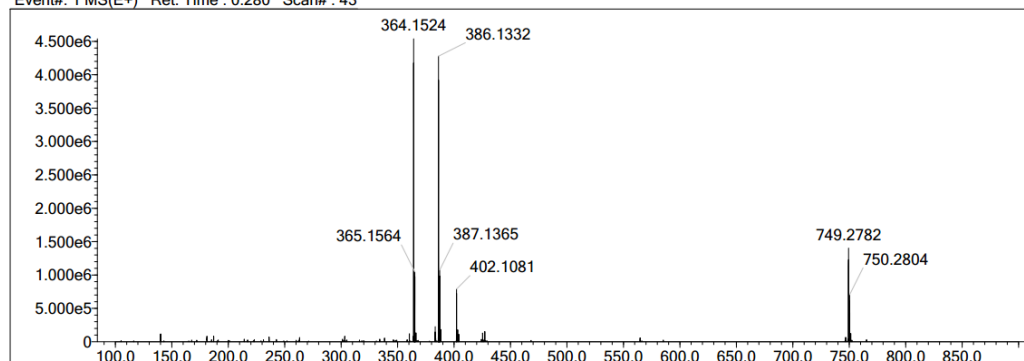

Measured region for 364.1524 m/z

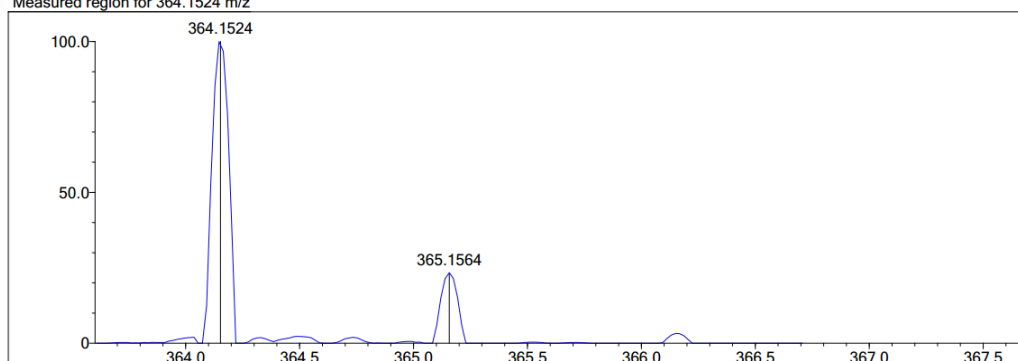

| Rank | Score | Formula (M)  | Ion                | Meas. m/z | Pred. m/z | Df. (mDa) | Df. (ppm) | Iso   | DBE  |
|------|-------|--------------|--------------------|-----------|-----------|-----------|-----------|-------|------|
| 2    | 78.66 | C22 H21 N O4 | [M+H] <sup>+</sup> | 364.1524  | 364.1543  | -1.9      | -5.22     | 89.59 | 13.0 |

## 11c

Event#: 1 MS(E+) Ret. Time : 0.373 Scan#: 57

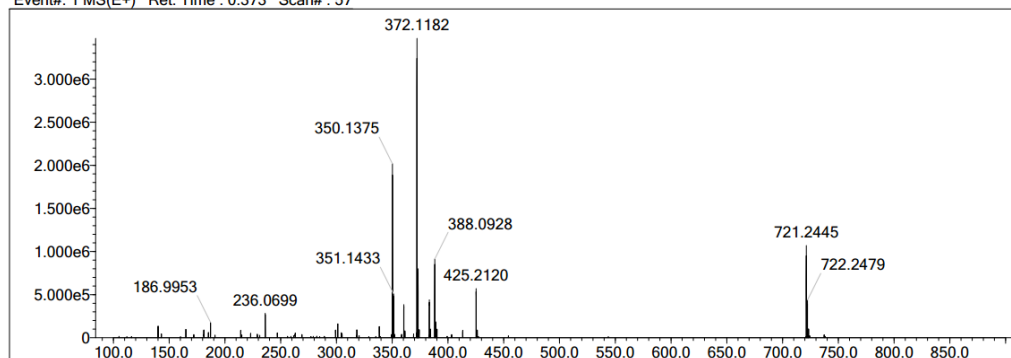

Measured region for 350.1375 m/z

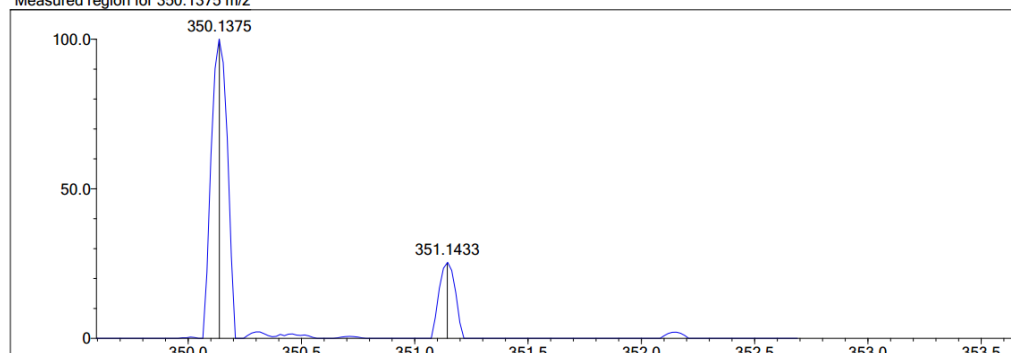

| Rank | Score | Formula (M)  | Ion                | Meas. m/z | Pred. m/z | Df. (mDa) | Df. (ppm) | Iso   | DBE  |
|------|-------|--------------|--------------------|-----------|-----------|-----------|-----------|-------|------|
| 1    | 73.38 | C21 H19 N O4 | [M+H] <sup>+</sup> | 350.1375  | 350.1387  | -1.2      | -3.43     | 78.13 | 13.0 |

11d

Event#: 1 MS(E+) Ret. Time : 0.347 Scan# : 53

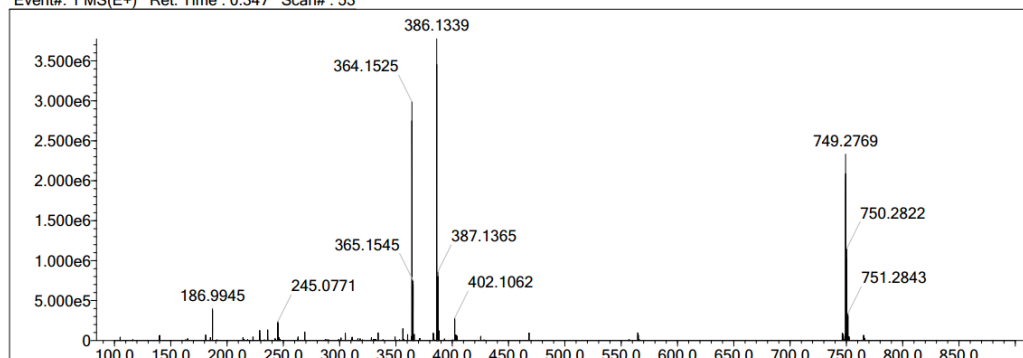

Measured region for 364.1525 m/z

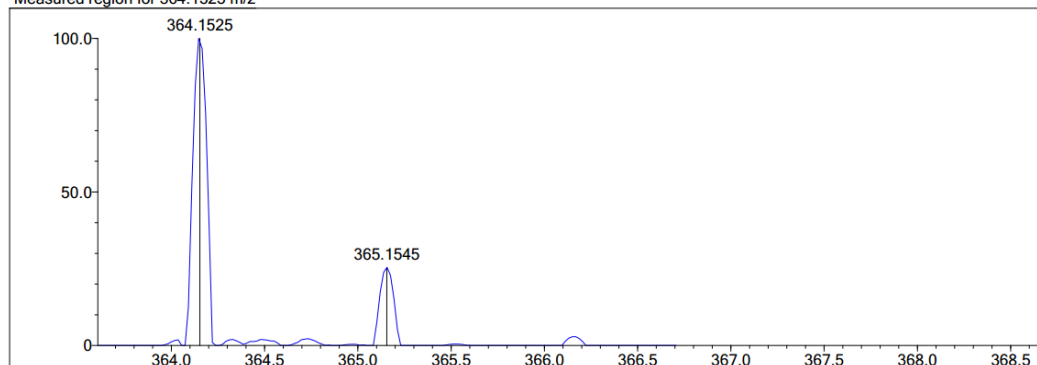

| Rank | Score | Formula (M)  | Ion                | Meas. m/z | Pred. m/z | Df. (mDa) | Df. (ppm) | Iso   | DBE  |
|------|-------|--------------|--------------------|-----------|-----------|-----------|-----------|-------|------|
| 1    | 80.53 | C22 H21 N O4 | [M+H] <sup>+</sup> | 364.1525  | 364.1543  | -1.8      | -4.94     | 89.33 | 13.0 |

## SIV.IR spectra of target compounds

8a

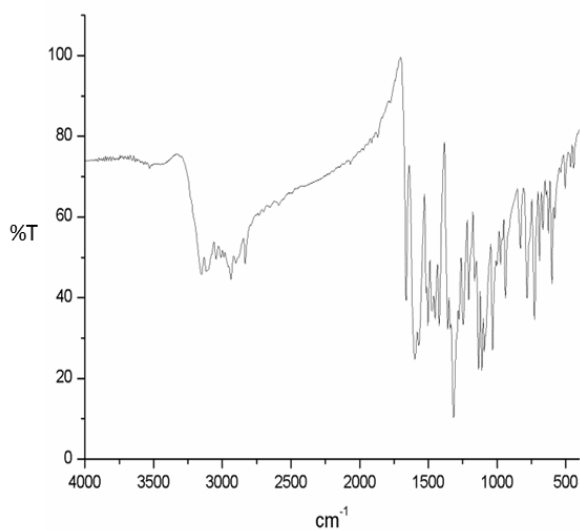

8b

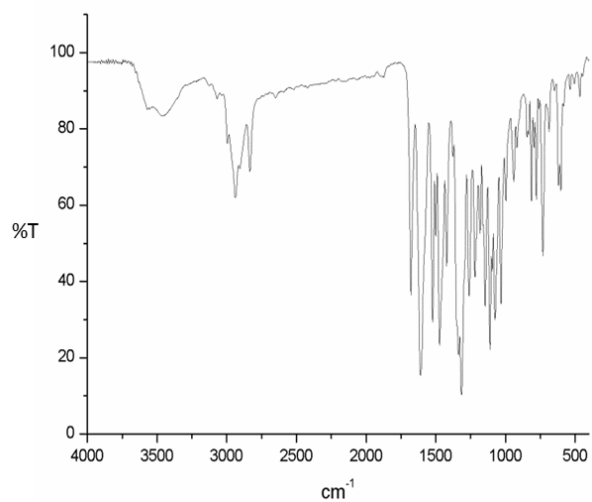

**8c**

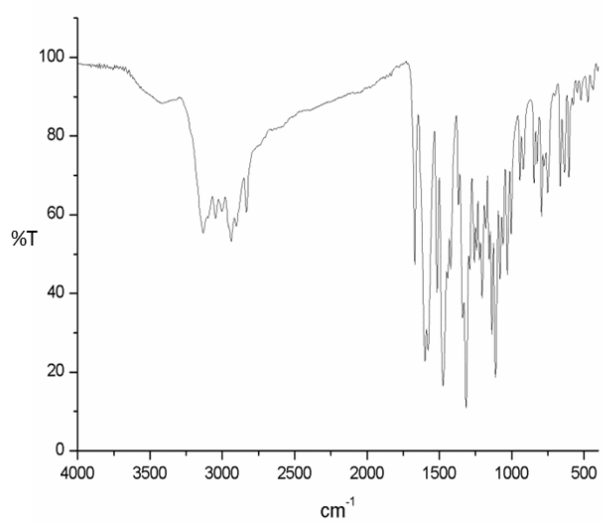

**8d**

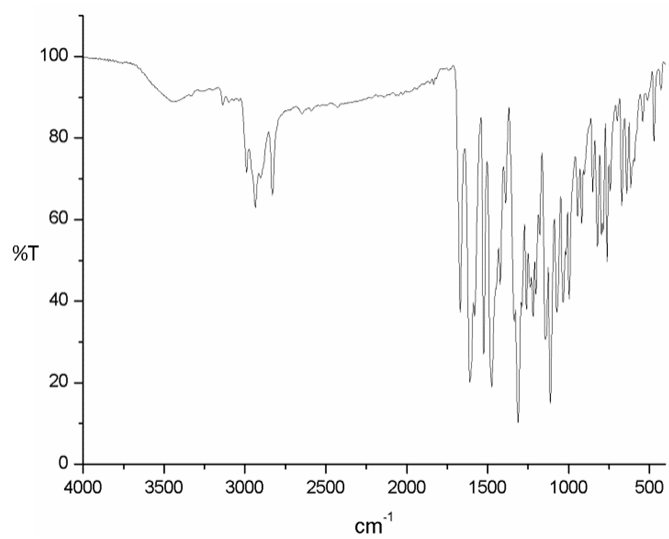

**8e**

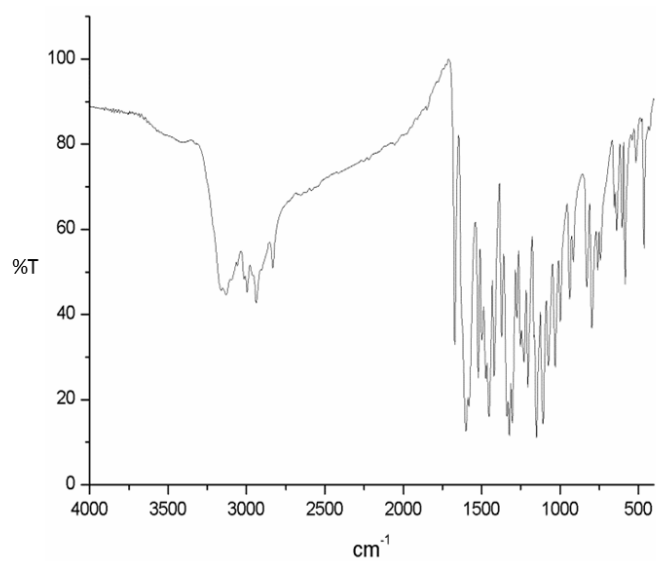

**8f**

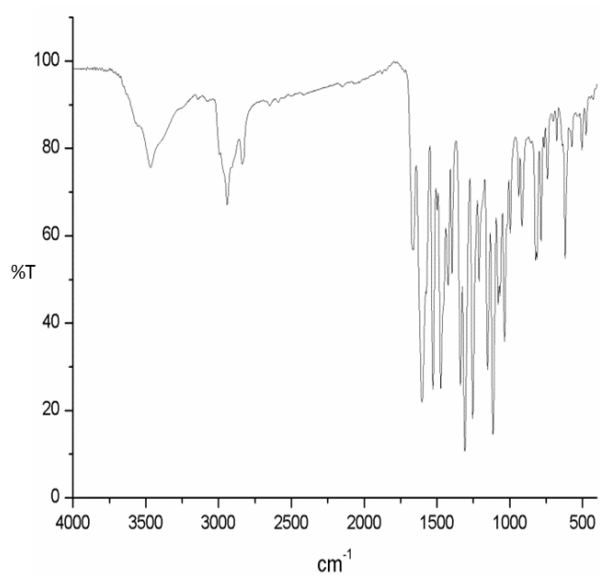

**10a**

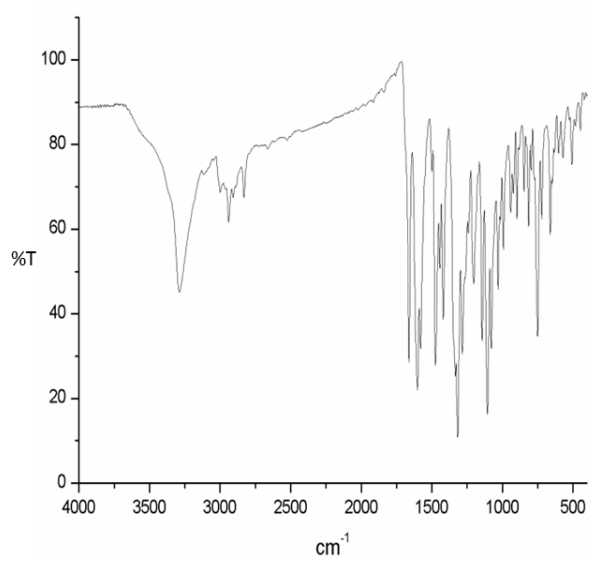

**10b**

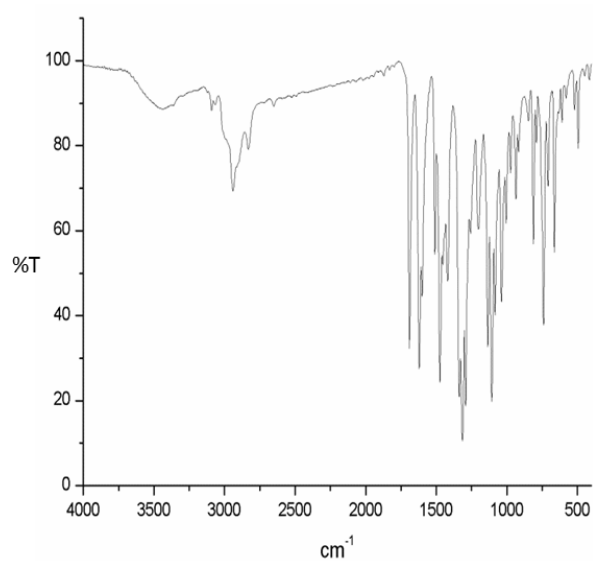

**10c**

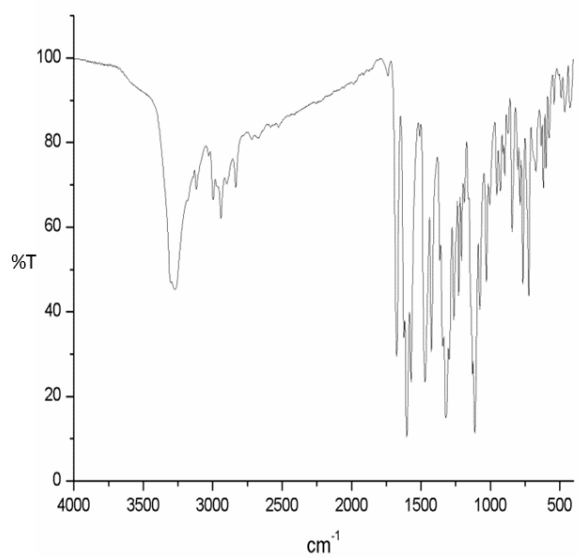

**10d**

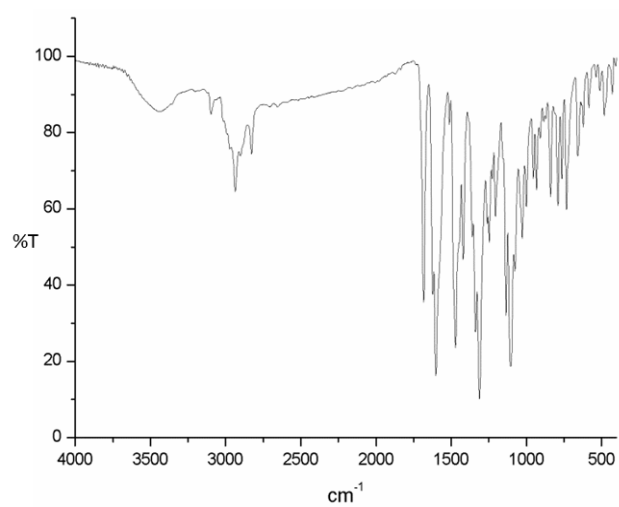

**11a**

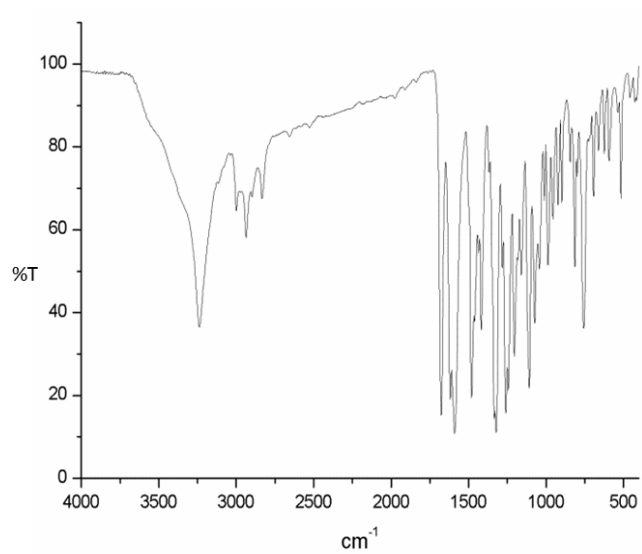

**11b**

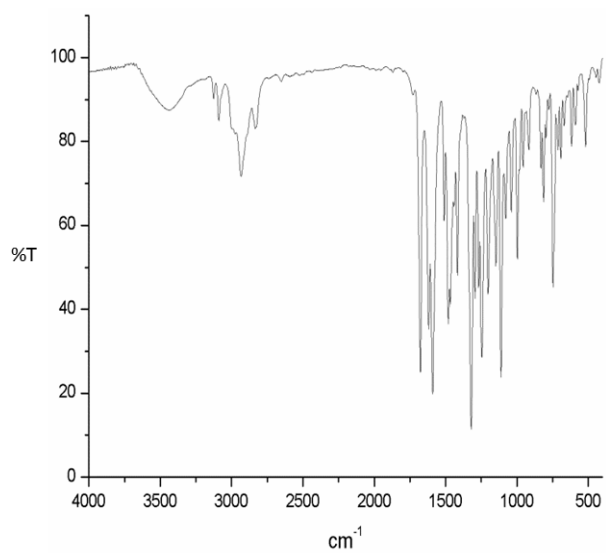

**11c**



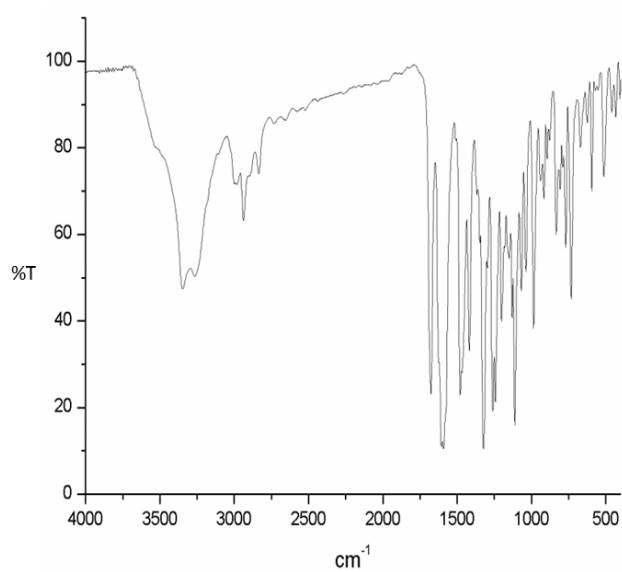

**11d**

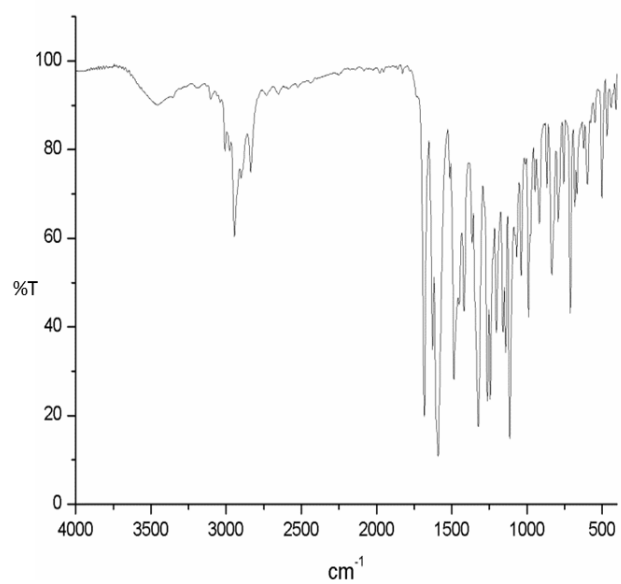

Supplement: c5ra14888j1.pdf [file c5ra14888j1.pdf]
